# Supplementary material for: Maternal urinary iodine concentration in pregnancy and children's cognition: results from a population-based birth cohort in an iodine-sufficient area
Source: PubMed Central journal article supplement — BMJ Open. 2014 Jun 12;4(6):e005520. doi: 10.1136/bmjopen-2014-005520 (PMC4067856; doi:10.1136/bmjopen-2014-005520), 2014-06-12
Supplement: bmjopen-2014-005520.draft_revisions.pdf [file bmjopen-2014-005520.draft_revisions.pdf]

# BMJ Open

## Maternal urinary iodine concentration in pregnancy and children's cognition: Results from an iodine-sufficient area

|                                                                                                                                                                                            |                                                                                                                                                                                                                                                                                                                                                                                                                                                                                                                                                                                                                                                                                                                                                                                                                                                                                                                  |
|--------------------------------------------------------------------------------------------------------------------------------------------------------------------------------------------|------------------------------------------------------------------------------------------------------------------------------------------------------------------------------------------------------------------------------------------------------------------------------------------------------------------------------------------------------------------------------------------------------------------------------------------------------------------------------------------------------------------------------------------------------------------------------------------------------------------------------------------------------------------------------------------------------------------------------------------------------------------------------------------------------------------------------------------------------------------------------------------------------------------|
| Journal:                                                                                                                                                                                   | <i>BMJ Open</i>                                                                                                                                                                                                                                                                                                                                                                                                                                                                                                                                                                                                                                                                                                                                                                                                                                                                                                  |
| Manuscript ID:                                                                                                                                                                             | bmjopen-2014-005520                                                                                                                                                                                                                                                                                                                                                                                                                                                                                                                                                                                                                                                                                                                                                                                                                                                                                              |
| Article Type:                                                                                                                                                                              | Research                                                                                                                                                                                                                                                                                                                                                                                                                                                                                                                                                                                                                                                                                                                                                                                                                                                                                                         |
| Date Submitted by the Author:                                                                                                                                                              | 21-Apr-2014                                                                                                                                                                                                                                                                                                                                                                                                                                                                                                                                                                                                                                                                                                                                                                                                                                                                                                      |
| Complete List of Authors:                                                                                                                                                                  | Ghassabian, Akhgar; Erasmus Medical Centre – Sophia Children's Hospital, Department of Child and Adolescent Psychiatry<br>Steenweg - de Graaff, Jolien; Erasmus Medical Centre – Sophia Children's Hospital, Department of Child and Adolescent Psychiatry<br>Peeters, Robin; Erasmus Medical Centre, Department of Internal Medicine<br>Alec Ross, H.; Radboud University Nijmegen Medical Centre, Department of Laboratory Medicine<br>Jaddoe, Vincent; Erasmus Medical Centre, The Generation R Study Group<br>Hofman, Albert; Erasmus Medical Centre, Department of Epidemiology<br>Verhulst, Frank; Erasmus MC, Department of Child and Adolescent Psychiatry/Psychology<br>White, Tonya; Erasmus MC, Department of Child and Adolescent Psychiatry/Psychology<br>Tiemeier, Henning; Erasmus Medical Center, Child and Adolescent Psychiatry/Psychology; Erasmus Medical Centre, Department of Epidemiology |
| <b>Primary Subject Heading</b>:                                                                                                                                                            | Epidemiology                                                                                                                                                                                                                                                                                                                                                                                                                                                                                                                                                                                                                                                                                                                                                                                                                                                                                                     |
| Secondary Subject Heading:                                                                                                                                                                 | Paediatrics, Mental health, Nutrition and metabolism, Public health                                                                                                                                                                                                                                                                                                                                                                                                                                                                                                                                                                                                                                                                                                                                                                                                                                              |
| Keywords:                                                                                                                                                                                  | EPIDEMIOLOGY, Child & adolescent psychiatry < PSYCHIATRY, Fetal medicine < OBSTETRICS                                                                                                                                                                                                                                                                                                                                                                                                                                                                                                                                                                                                                                                                                                                                                                                                                            |
| <p>Note: The following files were submitted by the author for peer review, but cannot be converted to PDF. You must view these files (e.g. movies) online.</p> <p>STROBE-Checklist.doc</p> |                                                                                                                                                                                                                                                                                                                                                                                                                                                                                                                                                                                                                                                                                                                                                                                                                                                                                                                  |

SCHOLARONE™  
Manuscripts

**Maternal urinary iodine concentration in pregnancy and children's cognition: Results from an iodine-sufficient area**

Akhgar Ghassabian<sup>1,2</sup>, Jolien Steenweg-de Graaff<sup>1,2</sup>, Robin P Peeters<sup>3,4</sup>, H Alec Ross<sup>5</sup>, Vincent W Jaddoe<sup>2,6,7</sup>, Albert Hofman<sup>7</sup>, Frank C Verhulst<sup>1</sup>, Tonya White<sup>1,8</sup>, and Henning Tiemeier<sup>1,7,9</sup>

<sup>1</sup>Department of Child and Adolescent Psychiatry, Erasmus Medical Centre – Sophia Children's Hospital, Rotterdam, the Netherlands

<sup>2</sup>The Generation R Study Group, Erasmus Medical Centre, Rotterdam, the Netherlands

<sup>3</sup>Department of Internal Medicine, Erasmus Medical Centre, Rotterdam, the Netherlands

<sup>4</sup>Rotterdam Thyroid Centre, Erasmus Medical Centre, Rotterdam, the Netherlands

<sup>5</sup>Department of Laboratory Medicine, Radboud University Nijmegen Medical Centre, Nijmegen, the Netherlands

<sup>6</sup>Department of Paediatrics, Erasmus Medical Centre – Sophia Children's Hospital, the Netherlands

<sup>7</sup>Department of Epidemiology, Erasmus Medical Centre, Rotterdam, the Netherlands

<sup>8</sup>Department of Radiology, Erasmus Medical Centre, Rotterdam, the Netherlands

<sup>9</sup>Department of Psychiatry, Erasmus Medical Centre, Rotterdam, the Netherlands

**Correspondence to** Akhgar Ghassabian, MD, PhD, Department of Child and Adolescent Psychiatry/Psychology, Erasmus Medical Centre–Sophia Children's Hospital, P.O. Box 2060, 3000 CB Rotterdam, the Netherlands. Tel: (+31) 10-703 8490, Fax: (+31) 10-704 3447, email: a.ghassabian@erasmusmc.nl

**Key words:** iodine, pregnancy, cognition

**Manuscript word count:** 1697

**Abstract word counts:** 200

**Number of tables:** 2

**Number of references:** 14

## Maternal iodine in pregnancy and children's cognition

**CONTRIBUTORSHIP STATEMENT**

*Design:* Jaddoe, Hofman, Verhulst, White, and Tiemeier

*Acquisition of the data:* Ghassabian, Alec Ross, and Tiemeier

*Analysis of the data:* Ghassabian and Tiemeier

*Interpretation of the data:* Ghassabian, Steenweg - de Graaff, Peeters, White, and Tiemeier

*Drafting the article:* Ghassabian and Tiemeier

*Critical revision of the manuscript for important intellectual content:* Ghassabian, Steenweg - de Graaff Peeters, Alec Ross, Jaddoe, Hofman, Verhulst, White, and Tiemeier

**ABSTRACT**

**Background.** Reports from populations with an insufficient iodine intake suggest that children of mothers with mild iodine deficiency during pregnancy are at risk for cognitive impairments. However, it is unknown whether, even in iodine sufficient areas, low levels of iodine intake occur that influence cognitive development in the offspring.

**Methods.** In 1525 mother-child pairs in a Dutch birth cohort, we investigated the relation between maternal urinary iodine concentration (UIC) <150 µg/g creatinine, assessed <18 weeks gestation, and children's nonverbal IQ and language comprehension. Cognition was assessed during a visit to the research centre using Dutch test batteries when the children were six years.

**Results.** The median UIC was 296.5 µg/g creatinine (90% range 112.8-710.2). We found a relation between maternal low UIC and children's suboptimum nonverbal IQ (unadjusted  $OR=1.44$ , 95% $CI$  1.02-2.02). However, after adjustment for confounders, maternal low UIC was not associated with children's nonverbal IQ (adjusted  $OR=1.33$ , 95% $CI$  0.92-1.93). Similar results emerged in the analysis of language comprehension at six years.

**Conclusion.** The lack of a clear association between maternal low UIC and children's cognition probably reflects that low levels of iodine were not frequent and severe as to affect neurodevelopment. This may result from the Dutch iodine supplementation policy.

## Maternal iodine in pregnancy and children's cognition

**ARTICLE SUMMARY: STRENGTHS AND LIMITATIONS OF THIS STUDY**

- The present study is performed in 1525 mother-child pairs from a country with optimal iodine intake (the Netherlands).
- In total, 188 pregnant women (12.3%) had UIC<150  $\mu\text{g/g}$  creatinine in early pregnancy.
- In this prospective study, there was no clear relation between maternal relatively low urinary iodine concentration and children's nonverbal IQ or language comprehension at age six years.
- Because mild iodine deficiency was not prevalent in our sample, it is possible that we did not have the power to detect a significant association between maternal low urinary iodine concentration and children's cognitive delay.
- The lack of a clear association with children's cognitive abilities likely reflects the policy of iodine supplementation in the Netherlands.

**DATA SHARING STATEMENT**

No additional data available.

## INTRODUCTION

Iodine is an essential micronutrient required for thyroid hormone production. Severe iodine deficiency is one of the major preventable causes of mental retardation worldwide.[1] Due to the supplementation of iodine to salt in many countries, severe iodine deficiency is a rare condition.[2] Nevertheless, mild-to-moderate iodine deficiency is still considered a major public health concern, even in some developed countries.[2]

Pregnant women are particularly susceptible to iodine deficiency because of higher requirement during pregnancy.[3] Guidelines recommend an almost 2-fold increase in dietary iodine intake during pregnancy to maintain optimal thyroid hormone production in both mother and foetus.[3,4] Randomized trials of iodine supplementation in pregnant women from regions with severe iodine deficiency confirmed the effect of maternal severe iodine deficiency on children's cognitive development.[5] Recently, an observational study by Bath et al. in UK ( $n=1040$ ) showed that the children born to mothers with mild-to-moderate iodine deficiency were at risk of impairments in nonverbal IQ and reading skills.[6] Similarly, in 228 mother-child pairs in Australia, Hynes et al. found a relation between maternal mild iodine deficiency and spelling errors in children.[7] Both UK and Australia are considered mild-to-moderate iodine deficient countries by International Council for Control of Iodine Deficiency Disorders (ICCIDD).[2] However, it is unclear if relatively low levels of iodine intake during pregnancy also occur in countries with optimal iodine status, which affect cognitive development in the offspring.

The goal of this study was to investigate the association between maternal low urinary iodine concentration (UIC) in pregnancy and children's cognition in a population-based sample from a country with an optimal iodine status (the Netherlands).[2] UIC is a good marker of dietary iodine intake, and can be assessed reliably in spot urine samples at the population level.[8]

## Maternal iodine in pregnancy and children's cognition

1  
2  
3 Adjustment of UIC for creatinine levels decreases the intra-individual variability in iodine  
4  
5 excretion, and provides an accurate estimate of iodine status in individuals.[8]  
6  
7

**METHODS****Participants**

10  
11  
12  
13  
14 This study was embedded within the Generation R Study, a population-based birth cohort in  
15  
16 Rotterdam, the Netherlands, which follows children from foetal life onwards.[9] The Medical  
17  
18 Ethics Committee of the Erasmus Medical Centre approved the study, and written informed  
19  
20 consent was obtained from parents. In total, 7145 pregnant women were recruited in early  
21  
22 pregnancy (gestational age < 18 weeks). All women had a delivery date between April 2002 and  
23  
24 January 2006. During early pregnancy, 2375 pregnant women provided urine samples. Urinary  
25  
26 iodine concentration was assessed in 2251 pregnant women with singleton live birth. In this  
27  
28 group, data on child cognitive measures were available in 1525 children at age six years. There  
29  
30 were no differences in maternal iodine levels and demographics between mother-child pairs  
31  
32 included in the analyses and those excluded because of missing data on child cognitive  
33  
34 measures.  
35  
36  
37  
38

**Measurements**

39  
40  
41  
42 During the first prenatal visit [mean gestational age = 13.28 (1.85), range 6.07-17.93 weeks],  
43  
44 maternal urine samples were collected at random times during the day. Urinary iodine was  
45  
46 measured by the ceri-arsenite reaction after digestion by means of ammonium persulfate. After  
47  
48 brief centrifugation, sodium arsenite solution (0.1 mol/L in 1 mol/L of sulphuric acid) was added.  
49  
50 Subsequently, ceri-ammonium sulfate was added, and color was allowed to develop at 250°C  
51  
52 over 60 min. Optical density was assessed at 405 nm. At a concentration of 1.7 µmol/L iodine  
53  
54 the within-assay CV was 5.1% and the between-assay CV was 14.3%. To adjust for total urinary  
55  
56 volume, we used the UIC adjusted for creatinine levels (UIC/creatinine). We defined low UIC as  
57  
58  
59  
60

## Maternal iodine in pregnancy and children's cognition

1  
2  
3 values <150 µg/g creatinine. To assess the iodine status of a population, the median (not the  
4  
5 mean) urinary iodine concentration is recommended, as urinary iodine concentrations are  
6  
7 influenced by recent iodine intake. For pregnant populations, the median urinary iodine levels of  
8  
9 <150 µg/l are considered as insufficient, 150–49 µg/l as adequate and >500 µg/l as  
10  
11 excessive.[3]  
12  
13

14  
15 At the age of six (mean age=6.0±0.3 years), the children were invited to visit the Generation R  
16  
17 research centre. During this visit, children's nonverbal IQ and language comprehension were  
18  
19 assessed using validated Dutch test batteries: two subtests of the Snijders-Oomen Niet-verbale  
20  
21 intelligentie Test–Revisie (SON-R 2½-7) and the receptive subtest of the Taaltest voor Kinderen  
22  
23 (TvK).[10,11]  
24  
25

26  
27 The subtests of SON-R 2½-7 were Mosaics (assesses spatial visualization abilities), and  
28  
29 Categories (assesses abstract reasoning abilities). Raw test scores were converted into  
30  
31 nonverbal IQ scores using norms tailored to exact age. For the receptive subtest of the TvK, the  
32  
33 children were given 26 test items, and for each item, they had to choose the best picture that  
34  
35 matched the given words. We added the total correct answers for each child and divided this  
36  
37 sum by the total number of items answered, yielding a percentage correct score. The correlation  
38  
39 between nonverbal IQ and language comprehension scores was  $r=0.42$  ( $p<0.001$ ).  
40  
41

42  
43 Information on birth date, sex, and birth weight was obtained from registries. Gestational age at  
44  
45 birth was established using an ultrasound examination during pregnancy. Birth order, parental  
46  
47 age and education, marital status, ethnicity, household income, and history of smoking, as well  
48  
49 as child's history of breastfeeding were assessed by questionnaires. Child's ethnic background  
50  
51 was defined based on the country of birth of both parents. Maternal education was defined by  
52  
53 the highest completed education. Maternal smoking was assessed at enrolment and in mid and  
54  
55 late pregnancy. Maternal weight and length were measured at enrolment and were used to  
56  
57  
58  
59  
60



## Maternal iodine in pregnancy and children's cognition

1  
2  
3 calculate body mass index (BMI). In early pregnancy, maternal folate concentrations were  
4  
5 analysed in plasma samples by using an immunoelectrochemiluminescence assay on the  
6  
7 Architect System (Abbott Diagnostics BV). We used the Brief Symptom Inventory, a validated  
8  
9 self-report questionnaire, to measure maternal psychopathology during pregnancy. Maternal IQ  
10  
11 was assessed during the child's visit to the research centre.  
12  
13

### 14 15 **Statistical Analyses**

16  
17  
18 Mother-child pairs with data on UIC and one or more cognitive measures were included in the  
19  
20 analyses. The percentage of missing data for covariates were below 10% except for maternal  
21  
22 psychopathology during pregnancy (17%), household income (17%), paternal education (32%),  
23  
24 and child's history of breastfeeding (13%). Missing values were imputed using multiple  
25  
26 imputations. Thirty copies of the original data set were generated with missing values replaced  
27  
28 by values randomly generated from the predictive distribution, on the basis of the correlation  
29  
30 between the variables.  
31  
32

33  
34 Maternal low UIC during early pregnancy was the determinant in all analyses. We used linear  
35  
36 regression to examine the relation between maternal low UIC and children's nonverbal IQ and  
37  
38 language comprehension scores. Language comprehension scores were log-transformed to  
39  
40 meet the assumption of normality. To facilitate the interpretation of findings, we also used  
41  
42 logistic regression to explore whether maternal low UIC was related to the odds of having a  
43  
44 nonverbal IQ or language comprehension score in the lowest quartile of the sample (nonverbal  
45  
46 IQ<93 and language comprehension score<0.77). Potential confounders were selected on the  
47  
48 basis of background knowledge.[6,7,12] The relation between maternal UIC and children's  
49  
50 cognition was examined in three steps: *model 1*, univariate association; *model 2*, adjusted for  
51  
52 the child's sex and age, and maternal age and education; *model 3* additionally adjusted for a  
53  
54 child's ethnic background, birth order, history of breastfeeding at age six months, paternal age,  
55  
56  
57  
58  
59  
60

1  
2  
3 maternal body mass index (BMI), maternal history of smoking, maternal IQ, marital status,  
4  
5 paternal education, maternal psychopathology in pregnancy, maternal folate concentration in  
6  
7 early pregnancy, household income, and time of urine sampling in pregnancy.  
8  
9

## 10 RESULTS

11  
12  
13 Our results showed that Generation R participants were iodine sufficient, with median  
14  
15 UIC=229.6  $\mu\text{g/l}$  (90% range 55.2, 732.6) [iodine to creatinine ratio 296.5  $\mu\text{g/g}$  creatinine (90%  
16  
17 range 112.8, 710.2)]. In total, 188 pregnant women (12.3%) had UIC<150  $\mu\text{g/g}$  creatinine; only  
18  
19 four pregnant women had UIC<50  $\mu\text{g/g}$  creatinine. Iodine status of the mother in pregnancy was  
20  
21 associated with maternal age, BMI, education, psychopathology scores in pregnancy, marital  
22  
23 status, and plasma folate levels in pregnancy (Table 1).  
24  
25  
26  
27  
28  
29  
30  
31  
32  
33  
34  
35  
36  
37  
38  
39  
40  
41  
42  
43  
44  
45  
46  
47  
48  
49  
50  
51  
52  
53  
54  
55  
56  
57  
58  
59  
60

## Maternal iodine in pregnancy and children's cognition

**Table 1** Baseline characteristics (n=1525)

|                                                 | Urinary Iodine Concentration (UIC) |                  |        |
|-------------------------------------------------|------------------------------------|------------------|--------|
|                                                 | adjusted for creatinine levels     |                  |        |
|                                                 | <150 µg/g                          | >150 µg/g        | p      |
| <b>Maternal characteristics</b>                 |                                    |                  |        |
| Age at enrolment, years                         | 30.8 (4.6)                         | 28.6 (5.3)       | <0.001 |
| Body mass index at enrolment                    | 24.4 (4.3)                         | 25.3 (5.1)       | 0.01   |
| Education, %                                    |                                    |                  |        |
| Primary                                         | 18.2                               | 27.5             |        |
| Secondary                                       | 54.3                               | 52.2             | 0.01   |
| Higher education                                | 27.5                               | 20.3             |        |
| Psychopathology score in pregnancy              | 0.14 (0.00-1.02)                   | 0.21 (0.02-1.31) | <0.001 |
| Smoking, %                                      |                                    |                  |        |
| Never                                           | 78.6                               | 73.1             |        |
| Stopped when pregnant                           | 8.5                                | 10.8             | 0.24   |
| Continued in pregnancy                          | 12.9                               | 16.1             |        |
| Household income                                |                                    |                  |        |
| <€1200                                          | 6.7                                | 11.5             |        |
| >€1200 & <€2000                                 | 14.3                               | 13.4             | 0.10   |
| >€2000                                          | 79.0                               | 75.1             |        |
| Marital status, married/with partner %          | 90.4                               | 78.9             | <0.001 |
| Folate concentration in early pregnancy, nmol/L | 19.2 (9.2)                         | 17.2 (8.2)       | 0.004  |
| Maternal IQ score                               | 97 (79-113)                        | 97 (80-113)      | 0.14   |

## Maternal iodine in pregnancy and children's cognition

|                                         |                     |                    |        |
|-----------------------------------------|---------------------|--------------------|--------|
| UIC adjusted for creatinine             | 322.9 (168.6-732.2) | 119.3 (65.5-147.1) | <0.001 |
| Gestational age at urine sampling       | 13.1 (10.5-16.8)    | 12.9 (10.2-16.5)   | 0.55   |
| <b>Paternal characteristics</b>         |                     |                    |        |
| Age at enrolment, yr                    | 33.5 (5.8)          | 31.9 (6.2)         | <0.001 |
| Education, %                            |                     |                    |        |
| Primary                                 | 16.6                | 19.8               |        |
| Secondary                               | 46.6                | 51.3               | 0.23   |
| High                                    | 36.8                | 28.9               |        |
| <b>Child characteristics</b>            |                     |                    |        |
| Age at visit, years                     | 5.9 (0.2)           | 5.9 (0.2)          | 1.00   |
| Sex, boy %                              | 48.8                | 49.5               | 0.87   |
| First born %                            | 59.1                | 62.0               | 0.44   |
| Ethnic background %                     |                     |                    |        |
| Dutch                                   | 57.5                | 57.2               |        |
| Other Western                           | 8.7                 | 7.0                | 0.67   |
| Non-Western                             | 33.8                | 35.8               |        |
| Birth weight                            | 3441 (521)          | 3419 (493)         | 0.60   |
| Gestational age at birth                | 40.3 (37.4-42.1)    | 40.3 (37.2-41.9)   | 0.90   |
| Breastfeeding at 6 months, yes          | 35.6                | 26.7               | 0.03   |
| IQ scores at 6 years                    | 102 (15)            | 100 (16)           | 0.12   |
| Language comprehension score at 6 years | 0.85 (0.62-0.96)    | 0.85 (0.61-0.96)   | 0.87   |

---

Numbers are mean (SD) for variables with normal distribution, median (90% range) for not-normally distributed variables, and percentages for categorical variables.

## Maternal iodine in pregnancy and children's cognition

1  
2  
3 Table 2 represents the association between maternal iodine status in pregnancy and children's  
4 cognition at age six years. After adjustment for possible confounders, we did not find a relation  
5 between maternal low UIC and children's nonverbal IQ or language comprehension.  
6  
7  
8  
9  
10  
11  
12  
13  
14  
15  
16  
17  
18  
19  
20  
21  
22  
23  
24  
25  
26  
27  
28  
29  
30  
31  
32  
33  
34  
35  
36  
37  
38  
39  
40  
41  
42  
43  
44  
45  
46  
47  
48  
49  
50  
51  
52  
53  
54  
55  
56  
57  
58  
59  
60

For peer review only

**Table 2** Maternal Urinary Iodine Concentration (UIC) adjusted for creatinine levels and children's nonverbal IQ and language comprehension at age 6 years.

|                         | Nonverbal IQ<br>(n=1450)   |                             | Language comprehension<br>(n=1319) |                             |
|-------------------------|----------------------------|-----------------------------|------------------------------------|-----------------------------|
|                         | Score                      | Suboptimum (n=351)          | Score                              | Suboptimum<br>(n=323)       |
| Determinant:            | <i>B</i> (95%CI), <i>p</i> | <i>OR</i> (95%CI), <i>p</i> | <i>B</i> (95%CI), <i>p</i>         | <i>OR</i> (95%CI), <i>p</i> |
| <b>UIC &lt;150 µg/g</b> |                            |                             |                                    |                             |
| Model 1                 | -2.16 (-4.52, 0.19), 0.07  | 1.44 (1.02, 2.02), 0.04     | -0.01 (-0.03, 0.02), 0.67          | 1.03 (0.71, 1.51), 0.86     |
| Model 2                 | -0.65 (-2.93, 1.63), 0.58  | 1.21 (0.85, 1.73), 0.30     | 0.01 (-0.01, 0.03), 0.44           | 0.85 (0.57, 1.27), 0.42     |
| Model 3                 | -0.86 (-3.10, 1.38), 0.45  | 1.33 (0.92, 1.92), 0.13     | 0.004 (-0.02, 0.03), 0.72          | 0.82 (0.56, 1.19), 0.82     |

Suboptimum nonverbal IQ: score in the lowest quartile (IQ scores <93).

Language score was log-transformed to satisfy the assumption of normality.

Suboptimum language comprehension: scores in the lowest quartile (language comprehension scores <0.77).

*Model 1*: unadjusted

*Model 2*: adjusted for child's sex and age at the time of cognitive assessment, maternal age and maternal educational levels

*Model 3*: adjusted for child's sex and age at the time of cognitive assessment, ethnic background, birth order, and history of breastfeeding at age six months, and parental age at the time of pregnancy, maternal body mass index, maternal history of smoking, maternal IQ, marital status, parental educational levels, maternal psychopathology in pregnancy, maternal folate concentration in early pregnancy, household income, and time of urine sampling in pregnancy

## Maternal iodine in pregnancy and children's cognition

**DISCUSSION**

The present study, performed in an iodine sufficient country, showed no clear relation between maternal low UIC in early pregnancy and children's nonverbal IQ or language comprehension at age six years. There are several possible explanations for this finding. First, this study was performed in the Netherlands, which has a population with an adequate dietary iodine intake.[13] Also, the median UIC in Generation R participants was much higher than the values reported in pregnant women of other populations (median UIC in this study=296.5  $\mu\text{g/g}$  creatinine, median UIC in the British study=110  $\mu\text{g/g}$  creatinine).[6,7] Even, the median UIC levels in the 'low' group of Generation R (median=119.3  $\mu\text{g/g}$  creatinine) was higher than the median UIC in the total sample of previous studies. These levels document that the Generation R multi-ethnic urban sample is iodine sufficient. Furthermore, many pregnant women of our sample may have been mostly iodine sufficient during the period of preconception or early postnatal phase, despite the fact that we observed a spot UIC lower than 150  $\mu\text{g/g}$  creatinine in pregnancy. Single measurement of urinary iodine is a good reflection of iodine status of a population, but may not necessarily reflect the iodine status of the individual. A second possible explanation is that the effect of iodine deficiency on child's neurodevelopment may be – to some extent – specific to verbal and reading abilities, and less apparent in nonverbal skills. In Generation R, we previously showed that low maternal UIC was related to poor working memory in children, but to not planning/organization.[14] However, the mechanisms through which mild iodine insufficiency influences child neurodevelopment are not clear. Third, despite a larger sample size compared to the British or Australian studies, the present study had a smaller group of women with UIC<150  $\mu\text{g/g}$  creatinine (188 women in the present study and 646 women in the British study). Because mild iodine deficiency is less prevalent in our sample, it is possible that we did not have the power to detect a significant association between maternal low UIC and children's cognitive delay. However, the observed effect sizes for low UIC in the present study

## Maternal iodine in pregnancy and children's cognition

1  
2  
3 (e.g.  $OR=1.33$ ,  $95\%CI$ : 0.92-1.92 for suboptimum nonverbal IQ) were very similar to those of  
4  
5 the British study ( $OR=1.35$ ,  $95\%CI$ : 0.93-1.94) for the comparable measure but did not reach  
6  
7 the significance level in either study.  
8  
9

10 The infrequent occurrence of maternal low UIC during pregnancy and the lack of a clear  
11  
12 association with children's cognitive abilities likely reflect the policy of iodine supplementation in  
13  
14 the Netherlands. This suggests that iodine supplementation policies can prevent adverse  
15  
16 neurodevelopmental outcomes in children.  
17  
18  
19  
20  
21  
22  
23  
24  
25  
26  
27  
28  
29  
30  
31  
32  
33  
34  
35  
36  
37  
38  
39  
40  
41  
42  
43  
44  
45  
46  
47  
48  
49  
50  
51  
52  
53  
54  
55  
56  
57  
58  
59  
60



**ACKNOWLEDGEMENT**

The Generation R Study is conducted by the Erasmus Medical Centre in close collaboration with the Municipal Health Service Rotterdam area, Rotterdam, the Rotterdam Homecare Foundation, Rotterdam and the Stichting Trombosedienst & Artsenlaboratorium Rijnmond (STAR-MDC), Rotterdam. We gratefully acknowledge the contribution of children and parents, general practitioners, hospitals, midwives and pharmacies in Rotterdam. The work of Dr Tiemeier and Dr Ghassabian was supported by a research grant from the European Community's 7th Framework Programme (FP7/2008–2013) under grant agreement 212652 (NUTRIMENTHE project, "The Effect of Diet on the Mental Performance of Children").

## REFERENCES

1. Zimmermann MB, Jooste PL, Pandav CS. Iodine-deficiency disorders. *Lancet* 2008;372(9645):1251-1262.
2. Andersson M, Karumbunathan V, Zimmermann MB. Global iodine status in 2011 and trends over the past decade. *J Nutr* 2012;142:744-750.
3. Stagnaro-Green A, Abalovich M, Alexander E, et al. Guidelines of the American Thyroid Association for the diagnosis and management of thyroid disease during pregnancy and postpartum. *Thyroid*. Oct 2011;21:1081-1125.
4. De Groot L, Abalovich M, Alexander EK, et al. Management of thyroid dysfunction during pregnancy and postpartum: an Endocrine Society clinical practice guideline. *J Clin Endocrinol Metab* 2012;97:2543-2565.
5. Zhou SJ, Anderson AJ, Gibson RA, et al. Effect of iodine supplementation in pregnancy on child development and other clinical outcomes: a systematic review of randomized controlled trials. *Am J Clin Nutr* 2013;98:1241-1254.
6. Bath SC, Steer CD, Golding J, et al. Effect of inadequate iodine status in UK pregnant women on cognitive outcomes in their children: results from the Avon Longitudinal Study of Parents and Children (ALSPAC). *Lancet* 2013;382:331-337.
7. Hynes KL, Otahal P, Hay I, et al. Mild iodine deficiency during pregnancy is associated with reduced educational outcomes in the offspring: 9-year follow-up of the gestational iodine cohort. *J Clin Endocrinol Metab* 2013;98:1954-1962.
8. Vejbjerg P, Knudsen N, Perrild H, et al. Estimation of iodine intake from various urinary iodine measurements in population studies. *Thyroid* 2009;19:1281-1286.
9. Jaddoe VW, van Duijn CM, Franco OH, et al. The Generation R Study: design and cohort update 2012. *Eur J Epidemiol* 2012;27:739-756.
10. Tellegen PJ, Winkel M, Wijnberg-Williams B, et al. *Snijders-Oomen Niet-Verbale Intelligentietest: SON-R 2 ½ -7*. Amsterdam: Boom Testuitgevers; 2005.
11. Bon WHJ, van. *Taaltests voor Kinderen*. Lisse: Swets & Zeitlinger; 1982.
12. Alvarez-Pedrerol M, Guxens M, Mendez M, et al. Iodine levels and thyroid hormones in healthy pregnant women and birth weight of their offspring. *Eur J Endocrinol* 2009;160:423-429.
13. National Institute for Public Health and the Environment. The iodine intake of children and adults in the Netherlands : Results of the Dutch National Food Consumption Survey 2007-2010. 2012;  
[http://www.rivm.nl/en/Documents\\_and\\_publications/Scientific/Reports/2012/april/The\\_iodine\\_intake\\_of\\_children\\_and\\_adults\\_in\\_the\\_Netherlands\\_Results\\_of\\_the\\_Dutch\\_National\\_Food\\_Consumption\\_Survey\\_2007\\_2010](http://www.rivm.nl/en/Documents_and_publications/Scientific/Reports/2012/april/The_iodine_intake_of_children_and_adults_in_the_Netherlands_Results_of_the_Dutch_National_Food_Consumption_Survey_2007_2010). Date accessed 2014-03-05.

## Maternal iodine in pregnancy and children's cognition

- 1  
2  
3  
4  
5  
6  
7  
8  
9  
10  
11  
12  
13  
14  
15  
16  
17  
18  
19  
20  
21  
22  
23  
24  
25  
26  
27  
28  
29  
30  
31  
32  
33  
34  
35  
36  
37  
38  
39  
40  
41  
42  
43  
44  
45  
46  
47  
48  
49  
50  
51  
52  
53  
54  
55  
56  
57  
58  
59  
60
14. van Mil NH, Tiemeier H, Bongers-Schokking JJ, et al. Low urinary iodine excretion during early pregnancy is associated with alterations in executive functioning in children. *J Nutr* 2012;142:2167-2174.

For peer review only

1  
2  
3  
4  
5  
6  
7  
8  
9  
10  
11  
12  
13  
14  
15  
16  
17  
18  
19  
20  
21  
22  
23  
24  
25  
26  
27  
28  
29  
30  
31  
32  
33  
34  
35  
36  
37  
38  
39  
40  
41  
42  
43  
44  
45  
46  
47  
48  
49  
50  
51  
52  
53  
54  
55  
56  
57  
58  
59  
60

What is already known on this subject?

Severe iodine deficiency, one of the major preventable causes of mental retardation worldwide, is a rare condition due to the supplementation of iodine to salt in many countries. Nevertheless, mild iodine deficiency is still considered a major public health concern, even in some developed countries. Reports from populations with an insufficient iodine intake suggest that children of mothers with mild iodine deficiency during pregnancy are at risk for cognitive impairments.

What this study adds?

The present study, performed in a country with optimal iodine intake, showed no clear relation between maternal relatively low urinary iodine concentration in early pregnancy and children's nonverbal IQ or language comprehension at age six years. The lack of a clear association with children's cognitive abilities likely reflects the policy of iodine supplementation in the Netherlands. This suggests that iodine supplementation policies can prevent adverse neurodevelopmental outcomes in children.

## STROBE Statement—checklist of items that should be included in reports of observational studies

|                           | Item No | Recommendation                                                                                                                                                                                                                                                                                                                                                                                                                                                                                                                                                                                                                                                                                                                                                                                                                                                                                                                                                                                                                  |
|---------------------------|---------|---------------------------------------------------------------------------------------------------------------------------------------------------------------------------------------------------------------------------------------------------------------------------------------------------------------------------------------------------------------------------------------------------------------------------------------------------------------------------------------------------------------------------------------------------------------------------------------------------------------------------------------------------------------------------------------------------------------------------------------------------------------------------------------------------------------------------------------------------------------------------------------------------------------------------------------------------------------------------------------------------------------------------------|
| <b>Title and abstract</b> | 1       | (a) Indicate the study's design with a commonly used term in the title or the abstract<br><b>Cohort</b><br>(b) Provide in the abstract an informative and balanced summary of what was done and what was found<br><b>Done</b>                                                                                                                                                                                                                                                                                                                                                                                                                                                                                                                                                                                                                                                                                                                                                                                                   |
| <b>Introduction</b>       |         |                                                                                                                                                                                                                                                                                                                                                                                                                                                                                                                                                                                                                                                                                                                                                                                                                                                                                                                                                                                                                                 |
| Background/rationale      | 2       | Explain the scientific background and rationale for the investigation being reported<br><b>Done</b>                                                                                                                                                                                                                                                                                                                                                                                                                                                                                                                                                                                                                                                                                                                                                                                                                                                                                                                             |
| Objectives                | 3       | State specific objectives, including any prespecified hypotheses<br><b>The goal of this study was to investigate the association between maternal low urinary iodine concentration (UIC) in pregnancy and children's cognition in a population-based sample from a country with an optimal iodine status (the Netherlands).</b>                                                                                                                                                                                                                                                                                                                                                                                                                                                                                                                                                                                                                                                                                                 |
| <b>Methods</b>            |         |                                                                                                                                                                                                                                                                                                                                                                                                                                                                                                                                                                                                                                                                                                                                                                                                                                                                                                                                                                                                                                 |
| Study design              | 4       | Present key elements of study design early in the paper<br><b>Population-based birth cohort</b>                                                                                                                                                                                                                                                                                                                                                                                                                                                                                                                                                                                                                                                                                                                                                                                                                                                                                                                                 |
| Setting                   | 5       | Describe the setting, locations, and relevant dates, including periods of recruitment, exposure, follow-up, and data collection<br><b>In Rotterdam, the Netherlands</b><br><b>In total, 7145 pregnant women were recruited in early pregnancy (gestational age&lt;18 weeks).</b><br><b>All women had a delivery date between April 2002 and January 2006.</b><br><b>Data on child cognitive measures were available in 1525 children at age six years.</b>                                                                                                                                                                                                                                                                                                                                                                                                                                                                                                                                                                      |
| Participants              | 6       | (a) <i>Cohort study</i> —Give the eligibility criteria, and the sources and methods of selection of participants. Describe methods of follow-up<br><b>In total, 7145 pregnant women were recruited in early pregnancy (gestational age&lt;18 weeks).</b><br><b>All women had a delivery date between April 2002 and January 2006.</b><br><b>At the age of six (mean age=6.0±0.3 years), the children were invited to visit the Generation R research centre.</b><br><i>Case-control study</i> —Give the eligibility criteria, and the sources and methods of case ascertainment and control selection. Give the rationale for the choice of cases and controls<br><i>Cross-sectional study</i> —Give the eligibility criteria, and the sources and methods of selection of participants<br>(b) <i>Cohort study</i> —For matched studies, give matching criteria and number of exposed and unexposed<br><b>N/A</b><br><i>Case-control study</i> —For matched studies, give matching criteria and the number of controls per case |
| Variables                 | 7       | Clearly define all outcomes, exposures, predictors, potential confounders, and effect modifiers. Give diagnostic criteria, if applicable                                                                                                                                                                                                                                                                                                                                                                                                                                                                                                                                                                                                                                                                                                                                                                                                                                                                                        |

|                              |    |                                                                                                                                                                                                                                                                                                                                                                                                                                                                                                                                                                                                                                                                                                                                                                                                                                                                                                                                                                                                                                                                                                                                                                                                                           |
|------------------------------|----|---------------------------------------------------------------------------------------------------------------------------------------------------------------------------------------------------------------------------------------------------------------------------------------------------------------------------------------------------------------------------------------------------------------------------------------------------------------------------------------------------------------------------------------------------------------------------------------------------------------------------------------------------------------------------------------------------------------------------------------------------------------------------------------------------------------------------------------------------------------------------------------------------------------------------------------------------------------------------------------------------------------------------------------------------------------------------------------------------------------------------------------------------------------------------------------------------------------------------|
|                              |    | <b>Done</b>                                                                                                                                                                                                                                                                                                                                                                                                                                                                                                                                                                                                                                                                                                                                                                                                                                                                                                                                                                                                                                                                                                                                                                                                               |
| Data sources/<br>measurement | 8* | For each variable of interest, give sources of data and details of methods of assessment (measurement).<br><b>Done</b><br>Describe comparability of assessment methods if there is more than one group<br>N/A                                                                                                                                                                                                                                                                                                                                                                                                                                                                                                                                                                                                                                                                                                                                                                                                                                                                                                                                                                                                             |
| Bias                         | 9  | Describe any efforts to address potential sources of bias<br><b>Done</b><br><b>Potential confounders were selected on the basis of background knowledge.</b>                                                                                                                                                                                                                                                                                                                                                                                                                                                                                                                                                                                                                                                                                                                                                                                                                                                                                                                                                                                                                                                              |
| Study size                   | 10 | Explain how the study size was arrived at<br><b>In this group, data on child cognitive measures were available in 1525 children at age six years.</b><br><b>Possible power problem is discussed:</b><br><b>Because mild iodine deficiency is less prevalent in our sample, it is possible that we did not have the power to detect a significant association between maternal low UIC and children's cognitive delay. However, the observed effect sizes for low UIC in the present study (e.g. OR=1.33, 95%CI: 0.92-1.92 for suboptimum nonverbal IQ) were very similar to those of the British study (OR=1.35, 95%CI: 0.93-1.94) for the comparable measure but did not reach the significance level in either study.</b>                                                                                                                                                                                                                                                                                                                                                                                                                                                                                               |
| Quantitative variables       | 11 | Explain how quantitative variables were handled in the analyses. If applicable, describe which groupings were chosen and why<br><b>Language comprehension scores were log-transformed to meet the assumption of normality. To facilitate the interpretation of findings, we also used logistic regression to explore whether maternal low UIC was related to the odds of having a nonverbal IQ or language comprehension score in the lowest quartile of the sample (nonverbal IQ&lt;93 and language comprehension score&lt;0.77).</b>                                                                                                                                                                                                                                                                                                                                                                                                                                                                                                                                                                                                                                                                                    |
| Statistical methods          | 12 | (a) Describe all statistical methods, including those used to control for confounding<br><b>Maternal low UIC during early pregnancy was the determinant in all analyses. We used linear regression to examine the relation between maternal low UIC and children's nonverbal IQ and language comprehension scores.</b><br><b>To facilitate the interpretation of findings, we also used logistic regression to explore whether maternal low UIC was related to the odds of having a nonverbal IQ or language comprehension score in the lowest quartile of the sample.</b><br><b>The relation between maternal UIC and children's cognition was examined in three steps: <i>model 1</i>, univariate association; <i>model 2</i>, adjusted for the child's sex and age, and maternal age and education; <i>model 3</i> additionally adjusted for a child's ethnic background, birth order, history of breastfeeding at age six months, paternal age, maternal body mass index (BMI), maternal history of smoking, maternal IQ, marital status, paternal education, maternal psychopathology in pregnancy, maternal folate concentration in early pregnancy, household income, and time of urine sampling in pregnancy.</b> |

1  
2 (b) Describe any methods used to examine subgroups and interactions

3 N/A

4  
5 (c) Explain how missing data were addressed

6 **Missing values were imputed using multiple imputations. Thirty copies of**  
7 **the original data set were generated with missing values replaced by**  
8 **values randomly generated from the predictive distribution, on the basis**  
9 **of the correlation between the variables.**

10  
11 (d) *Cohort study*—If applicable, explain how loss to follow-up was addressed

12 **There were no differences in maternal iodine levels and demographics**  
13 **between mother-child pairs included in the analyses and those excluded**  
14 **because of missing data on child cognitive measures.**

15  
16 *Case-control study*—If applicable, explain how matching of cases and controls was  
17 addressed

18  
19 *Cross-sectional study*—If applicable, describe analytical methods taking account of  
20 sampling strategy

21 (e) Describe any sensitivity analyses

22 N/A

23 Continued on next page

---

**Results**


---

|                  |     |                                                                                                                                                                                                                                                                                                                                                                                                                                                                                                                                                                                                                                                                                                                                                                                                                                                                                                                                                                                                                                                                                                                                                                                                                                                                                                                                                                                                                                                    |
|------------------|-----|----------------------------------------------------------------------------------------------------------------------------------------------------------------------------------------------------------------------------------------------------------------------------------------------------------------------------------------------------------------------------------------------------------------------------------------------------------------------------------------------------------------------------------------------------------------------------------------------------------------------------------------------------------------------------------------------------------------------------------------------------------------------------------------------------------------------------------------------------------------------------------------------------------------------------------------------------------------------------------------------------------------------------------------------------------------------------------------------------------------------------------------------------------------------------------------------------------------------------------------------------------------------------------------------------------------------------------------------------------------------------------------------------------------------------------------------------|
| Participants     | 13* | <p>(a) Report numbers of individuals at each stage of study—eg numbers potentially eligible, examined for eligibility, confirmed eligible, included in the study, completing follow-up, and analysed</p> <p><b>In total, 7145 pregnant women were recruited in early pregnancy (gestational age&lt;18 weeks). During early pregnancy, 2375 pregnant women provided urine samples. Urinary iodine concentration was assessed in 2251 pregnant women with singleton live birth. In this group, data on child cognitive measures were available in 1525 children at age six years.</b></p> <hr/> <p>(b) Give reasons for non-participation at each stage</p> <p><b>The reasons are given if known.</b></p> <hr/> <p>(c) Consider use of a flow diagram</p> <p><b>Criteria for eligibility and exclusion at each stage are described in the text.</b></p>                                                                                                                                                                                                                                                                                                                                                                                                                                                                                                                                                                                              |
| Descriptive data | 14* | <p>(a) Give characteristics of study participants (eg demographic, clinical, social) and information on exposures and potential confounders</p> <p><b>Table 1</b></p> <hr/> <p>(b) Indicate number of participants with missing data for each variable of interest</p> <p><b>The percentage of missing data for covariates were below 10% except for maternal psychopathology during pregnancy (17%), household income (17%), paternal education (32%), and child's history of breastfeeding (13%).</b></p> <hr/> <p>(c) <i>Cohort study</i>—Summarise follow-up time (eg, average and total amount)</p>                                                                                                                                                                                                                                                                                                                                                                                                                                                                                                                                                                                                                                                                                                                                                                                                                                           |
| Outcome data     | 15* | <p><i>Cohort study</i>—Report numbers of outcome events or summary measures over time</p> <p><b>Table 1</b></p> <hr/> <p><i>Case-control study</i>—Report numbers in each exposure category, or summary measures of exposure</p> <hr/> <p><i>Cross-sectional study</i>—Report numbers of outcome events or summary measures</p>                                                                                                                                                                                                                                                                                                                                                                                                                                                                                                                                                                                                                                                                                                                                                                                                                                                                                                                                                                                                                                                                                                                    |
| Main results     | 16  | <p>(a) Give unadjusted estimates and, if applicable, confounder-adjusted estimates and their precision (eg, 95% confidence interval). Make clear which confounders were adjusted for and why they were included</p> <p><b>Table 2</b></p> <p><b>The relation between maternal UIC and children's cognition was examined in three steps: <i>model 1</i>, univariate association; <i>model 2</i>, adjusted for the child's sex and age, and maternal age and education; <i>model 3</i> additionally adjusted for a child's ethnic background, birth order, history of breastfeeding at age six months, paternal age, maternal body mass index (BMI), maternal history of smoking, maternal IQ, marital status, paternal education, maternal psychopathology in pregnancy, maternal folate concentration in early pregnancy, household income, and time of urine sampling in pregnancy.</b></p> <hr/> <p>(b) Report category boundaries when continuous variables were categorized</p> <p><b>To facilitate the interpretation of findings, we also used logistic regression to explore whether maternal low UIC was related to the odds of having a nonverbal IQ or language comprehension score in the lowest quartile of the sample (nonverbal IQ&lt;93 and language comprehension score&lt;0.77).</b></p> <hr/> <p>(c) If relevant, consider translating estimates of relative risk into absolute risk for a meaningful time period</p> <p>N/A</p> |



1  
2  
3  
4  
5  
6  
7  
8  
9  
10  
11  
12  
13  
14  
15  
16  
17  
18  
19  
20  
21  
22  
23  
24  
25  
26  
27  
28  
29  
30  
31  
32  
33  
34  
35  
36  
37  
38  
39  
40  
41  
42  
43  
44  
45  
46  
47  
48  
49  
50  
51  
52  
53  
54  
55  
56  
57  
58  
59  
60

|                |    |                                                                                                       |
|----------------|----|-------------------------------------------------------------------------------------------------------|
| Other analyses | 17 | Report other analyses done—eg analyses of subgroups and interactions, and sensitivity analyses<br>N/A |
|----------------|----|-------------------------------------------------------------------------------------------------------|

---

#### Discussion

|             |    |                                                                                                                                                                                                                                                                                                                                         |
|-------------|----|-----------------------------------------------------------------------------------------------------------------------------------------------------------------------------------------------------------------------------------------------------------------------------------------------------------------------------------------|
| Key results | 18 | Summarise key results with reference to study objectives<br><b>The present study, performed in an iodine sufficient country, showed no clear relation between maternal low UIC in early pregnancy and children’s nonverbal IQ or language comprehension at age six years. There are several possible explanations for this finding.</b> |
|-------------|----|-----------------------------------------------------------------------------------------------------------------------------------------------------------------------------------------------------------------------------------------------------------------------------------------------------------------------------------------|

|             |    |                                                                                                                                                                           |
|-------------|----|---------------------------------------------------------------------------------------------------------------------------------------------------------------------------|
| Limitations | 19 | Discuss limitations of the study, taking into account sources of potential bias or imprecision. Discuss both direction and magnitude of any potential bias<br><b>Done</b> |
|-------------|----|---------------------------------------------------------------------------------------------------------------------------------------------------------------------------|

|                |    |                                                                                                                                                                                           |
|----------------|----|-------------------------------------------------------------------------------------------------------------------------------------------------------------------------------------------|
| Interpretation | 20 | Give a cautious overall interpretation of results considering objectives, limitations, multiplicity of analyses, results from similar studies, and other relevant evidence<br><b>Done</b> |
|----------------|----|-------------------------------------------------------------------------------------------------------------------------------------------------------------------------------------------|

|                  |    |                                                                                      |
|------------------|----|--------------------------------------------------------------------------------------|
| Generalisability | 21 | Discuss the generalisability (external validity) of the study results<br><b>Done</b> |
|------------------|----|--------------------------------------------------------------------------------------|

---

#### Other information

|         |    |                                                                                                                                                                                                 |
|---------|----|-------------------------------------------------------------------------------------------------------------------------------------------------------------------------------------------------|
| Funding | 22 | Give the source of funding and the role of the funders for the present study and, if applicable, for the original study on which the present article is based<br><b>Done in acknowledgement</b> |
|---------|----|-------------------------------------------------------------------------------------------------------------------------------------------------------------------------------------------------|

\*Give information separately for cases and controls in case-control studies and, if applicable, for exposed and unexposed groups in cohort and cross-sectional studies.

**Note:** An Explanation and Elaboration article discusses each checklist item and gives methodological background and published examples of transparent reporting. The STROBE checklist is best used in conjunction with this article (freely available on the Web sites of PLoS Medicine at <http://www.plosmedicine.org/>, Annals of Internal Medicine at <http://www.annals.org/>, and Epidemiology at <http://www.epidem.com/>). Information on the STROBE Initiative is available at [www.strobe-statement.org](http://www.strobe-statement.org).

# BMJ Open

## Maternal urinary iodine concentration in pregnancy and children's cognition: Results from a population-based birth cohort in an iodine-sufficient area

|                                 |                                                                                                                                                                                                                                                                                                                                                                                                                                                                                                                                                                                                                                                                                                                                                                                                                                                                                                                  |
|---------------------------------|------------------------------------------------------------------------------------------------------------------------------------------------------------------------------------------------------------------------------------------------------------------------------------------------------------------------------------------------------------------------------------------------------------------------------------------------------------------------------------------------------------------------------------------------------------------------------------------------------------------------------------------------------------------------------------------------------------------------------------------------------------------------------------------------------------------------------------------------------------------------------------------------------------------|
| Journal:                        | <i>BMJ Open</i>                                                                                                                                                                                                                                                                                                                                                                                                                                                                                                                                                                                                                                                                                                                                                                                                                                                                                                  |
| Manuscript ID:                  | bmjopen-2014-005520.R1                                                                                                                                                                                                                                                                                                                                                                                                                                                                                                                                                                                                                                                                                                                                                                                                                                                                                           |
| Article Type:                   | Research                                                                                                                                                                                                                                                                                                                                                                                                                                                                                                                                                                                                                                                                                                                                                                                                                                                                                                         |
| Date Submitted by the Author:   | 26-May-2014                                                                                                                                                                                                                                                                                                                                                                                                                                                                                                                                                                                                                                                                                                                                                                                                                                                                                                      |
| Complete List of Authors:       | Ghassabian, Akhgar; Erasmus Medical Centre – Sophia Children's Hospital, Department of Child and Adolescent Psychiatry<br>Steenweg - de Graaff, Jolien; Erasmus Medical Centre – Sophia Children's Hospital, Department of Child and Adolescent Psychiatry<br>Peeters, Robin; Erasmus Medical Centre, Department of Internal Medicine<br>Alec Ross, H.; Radboud University Nijmegen Medical Centre, Department of Laboratory Medicine<br>Jaddoe, Vincent; Erasmus Medical Centre, The Generation R Study Group<br>Hofman, Albert; Erasmus Medical Centre, Department of Epidemiology<br>Verhulst, Frank; Erasmus MC, Department of Child and Adolescent Psychiatry/Psychology<br>White, Tonya; Erasmus MC, Department of Child and Adolescent Psychiatry/Psychology<br>Tiemeier, Henning; Erasmus Medical Center, Child and Adolescent Psychiatry/Psychology; Erasmus Medical Centre, Department of Epidemiology |
| <b>Primary Subject Heading</b>: | Epidemiology                                                                                                                                                                                                                                                                                                                                                                                                                                                                                                                                                                                                                                                                                                                                                                                                                                                                                                     |
| Secondary Subject Heading:      | Paediatrics, Mental health, Nutrition and metabolism, Public health                                                                                                                                                                                                                                                                                                                                                                                                                                                                                                                                                                                                                                                                                                                                                                                                                                              |
| Keywords:                       | EPIDEMIOLGY, Child & adolescent psychiatry < PSYCHIATRY, Fetal medicine < OBSTETRICS                                                                                                                                                                                                                                                                                                                                                                                                                                                                                                                                                                                                                                                                                                                                                                                                                             |
|                                 |                                                                                                                                                                                                                                                                                                                                                                                                                                                                                                                                                                                                                                                                                                                                                                                                                                                                                                                  |

SCHOLARONE™  
Manuscripts

1  
2  
3 **Maternal urinary iodine concentration in pregnancy and children's cognition: Results**  
4 **from a population-based birth cohort in an iodine-sufficient area**  
5

6 Akhgar Ghassabian<sup>1,2</sup>, Jolien Steenweg-de Graaff<sup>1,2</sup>, Robin P Peeters<sup>3,4</sup>, H Alec Ross<sup>5</sup>, Vincent  
7 W Jaddoe<sup>2,6,7</sup>, Albert Hofman<sup>7</sup>, Frank C Verhulst<sup>1</sup>, Tonya White<sup>1,8</sup>, and Henning Tiemeier<sup>1,7,9</sup>  
8  
9

10 <sup>1</sup>Department of Child and Adolescent Psychiatry, Erasmus Medical Centre – Sophia Children's  
11 Hospital, Rotterdam, the Netherlands

12 <sup>2</sup>The Generation R Study Group, Erasmus Medical Centre, Rotterdam, the Netherlands

13 <sup>3</sup>Department of Internal Medicine, Erasmus Medical Centre, Rotterdam, the Netherlands

14 <sup>4</sup>Rotterdam Thyroid Centre, Erasmus Medical Centre, Rotterdam, the Netherlands

15 <sup>5</sup>Department of Laboratory Medicine, Radboud University Nijmegen Medical Centre, Nijmegen,  
16 the Netherlands

17 <sup>6</sup>Department of Paediatrics, Erasmus Medical Centre – Sophia Children's Hospital, the  
18 Netherlands

19 <sup>7</sup>Department of Epidemiology, Erasmus Medical Centre, Rotterdam, the Netherlands

20 <sup>8</sup>Department of Radiology, Erasmus Medical Centre, Rotterdam, the Netherlands

21 <sup>9</sup>Department of Psychiatry, Erasmus Medical Centre, Rotterdam, the Netherlands  
22  
23  
24  
25  
26  
27

28 **Correspondence to** Akhgar Ghassabian, MD, PhD, Department of Child and Adolescent  
29 Psychiatry/Psychology, Erasmus Medical Centre–Sophia Children's Hospital, P.O. Box 2060,  
30 3000 CB Rotterdam, the Netherlands. Tel: (+31) 10-703 8490, Fax: (+31) 10-704 3447, email:  
31 a.ghassabian@erasmusmc.nl  
32  
33

34 **Key words:** iodine, pregnancy, cognition  
35  
36  
37  
38  
39  
40  
41  
42  
43  
44  
45  
46  
47  
48  
49  
50  
51  
52  
53  
54  
55  
56  
57  
58  
59  
60

**Manuscript word count:** 2001

**Abstract word counts:** 289

**Number of tables:** 2

**Number of references:** 16

## Maternal iodine in pregnancy and children's cognition

**ABSTRACT**

**Objectives.** Reports from populations with an insufficient iodine intake suggest that children of mothers with mild iodine deficiency during pregnancy are at risk for cognitive impairments. However, it is unknown whether, even in iodine sufficient areas, low levels of iodine intake occur that influence cognitive development in the offspring. This study investigated the association between maternal low urinary iodine concentration (UIC) in pregnancy and children's cognition in a population-based sample from a country with an optimal iodine status (the Netherlands).

**Setting and participants.** In 1525 mother-child pairs in a Dutch multi-ethnic birth cohort, we investigated the relation between maternal UIC < 150 µg/g creatinine, assessed < 18 weeks gestation, and children's cognition.

**Outcomes measures.** Nonverbal IQ and language comprehension was assessed during a visit to the research centre using Dutch test batteries when the children were six years.

**Results.** In total, 188 (12.3%) pregnant women had UIC < 150 µg/g creatinine, with a median UIC equals to 119.3 µg/g creatinine. The median UIC in the group with UIC > 150 µg/g creatinine was 322.9 µg/g and in the whole sample 296.5 µg/g creatinine. There was a univariate association between maternal low UIC and children's suboptimum nonverbal IQ (unadjusted OR=1.44, 95%CI: 1.02-2.02). However, after adjustment for confounders, maternal low UIC was not associated with children's nonverbal IQ (adjusted OR=1.33, 95%CI 0.92-1.93). There was no relation between maternal UIC in early pregnancy and children's language comprehension at six years.

**Conclusion.** The lack of a clear association between maternal low UIC and children's cognition probably reflects that low levels of iodine were not frequent and severe as to affect neurodevelopment. This may result from the Dutch iodine fortification policy, which allows

1  
2  
3  
4  
5  
6  
7  
8  
9  
10  
11  
12  
13  
14  
15  
16  
17  
18  
19  
20  
21  
22  
23  
24  
25  
26  
27  
28  
29  
30  
31  
32  
33  
34  
35  
36  
37  
38  
39  
40  
41  
42  
43  
44  
45  
46  
47  
48  
49  
50  
51  
52  
53  
54  
55  
56  
57  
58  
59  
60

adding iodized salt to almost all processed food and emphasizes the monitoring of iodine intake in the population.

For peer review only

## Maternal iodine in pregnancy and children's cognition

**ARTICLE SUMMARY: STRENGTHS AND LIMITATIONS OF THIS STUDY**

- The present study is performed in 1525 mother-child pairs from a country with optimal iodine intake (the Netherlands).
- In total, 188 pregnant women (12.3%) had UIC<150  $\mu\text{g/g}$  creatinine in early pregnancy.
- In this prospective study, there was no clear relation between maternal relatively low urinary iodine concentration and children's nonverbal IQ or language comprehension at age six years.
- Because mild iodine deficiency was not prevalent in our sample, it is possible that we did not have the power to detect a significant association between maternal low urinary iodine concentration and children's cognitive delay.
- The lack of a clear association with children's cognitive abilities likely reflects fortification policy in the Netherlands, which allows adding iodized salt to almost all processed food and emphasizes the monitoring of iodine intake in the population.

## INTRODUCTION

Iodine is an essential micronutrient required for thyroid hormone production. Severe iodine deficiency is one of the major preventable causes of mental retardation worldwide.[1] Due to the iodine fortification of salt in many countries, severe iodine deficiency is a rare condition.[2] Nevertheless, mild-to-moderate iodine deficiency is still considered a major public health concern, even in some developed countries.[2]

Pregnant women are particularly susceptible to iodine deficiency because of higher requirement during pregnancy.[3] Guidelines recommend an almost 2-fold increase in dietary iodine intake during pregnancy to maintain optimal thyroid hormone production in both mother and foetus.[3,4] Randomized trials of iodine supplementation in pregnant women from regions with severe iodine deficiency confirmed the effect of maternal severe iodine deficiency on children's cognitive development.[5] Recently, an observational study by Bath et al. in UK ( $n=1040$ ) showed that the children born to mothers with mild-to-moderate iodine deficiency were at risk of impairments in nonverbal IQ and reading skills.[6] In this study, mild-to-moderate iodine deficiency was defined as having urinary iodine concentration (UIC) lower than 150  $\mu\text{g/g}$  of creatinine on the basis of World Health Organization criteria.[3] Similarly, in 228 mother-child pairs in Australia, Hynes et al. found a relation between maternal mild iodine deficiency (UIC<150  $\mu\text{g/L}$ ) and standardized academic test score, e.g. spelling errors, in children.[7] Both UK and Australia are considered mild-to-moderate iodine deficient countries by International Council for Control of Iodine Deficiency Disorders (ICCIDD).[2] However, it is unclear if relatively low levels of iodine intake during pregnancy also occur in countries with optimal iodine status, which affect cognitive development in the offspring.

The goal of this study was to investigate the association between maternal low UIC in pregnancy and children's cognition in a population-based sample from a country with an optimal

## Maternal iodine in pregnancy and children's cognition

1  
2  
3 iodine status (the Netherlands).[2] UIC is a good marker of dietary iodine intake, and can be  
4  
5 assessed reliably in spot urine samples at the population level.[8] Adjustment of UIC for  
6  
7 creatinine levels decreases the intra-individual variability in iodine excretion, and provides a  
8  
9 more accurate estimate of iodine status in individuals compared to crude values.[8]  
10

**METHODS****Participants**

11  
12  
13  
14  
15  
16  
17  
18  
19 This study was embedded within the Generation R Study, a population-based birth cohort in  
20  
21 Rotterdam, the Netherlands, which follows children from foetal life onwards.[9] The Medical  
22  
23 Ethics Committee of the Erasmus Medical Centre approved the study, and written informed  
24  
25 consent was obtained from parents. In total, 7145 pregnant women were recruited in early  
26  
27 pregnancy (gestational age < 18 weeks). All women had a delivery date between April 2002 and  
28  
29 January 2006. During early pregnancy, 2375 pregnant women provided urine samples. Urinary  
30  
31 iodine concentration was assessed in 2251 pregnant women with singleton live birth. In this  
32  
33 group, data on child cognitive measures were available in 1525 children at age six years. There  
34  
35 was no difference in maternal iodine levels between mother-child pairs included in the analyses  
36  
37 and those excluded because of missing data on child cognitive measures. Likewise,  
38  
39 demographic characteristics including maternal age and education, household income, or child's  
40  
41 characteristics such as gestational age at birth or ethnic background did not differ between  
42  
43 these two groups.  
44  
45  
46

**Measurements**

47  
48  
49 During the first prenatal visit [mean gestational age = 13.28 (1.85), range 6.07-17.93 weeks],  
50  
51 maternal urine samples were collected at random times during the day. Urinary iodine was  
52  
53 measured by the ceri-arsenite reaction after digestion by means of ammonium persulfate. After  
54  
55 brief centrifugation, sodium arsenite solution (0.1 mol/L in 1 mol/L of sulphuric acid) was added.  
56  
57  
58  
59  
60



## Maternal iodine in pregnancy and children's cognition

1  
2  
3 Subsequently, ceri-ammonium sulfate was added, and color was allowed to develop at 250°C  
4  
5 over 60 min. Optical density was assessed at 405 nm. At a concentration of 1.7 µmol/L iodine  
6  
7 the within-assay CV was 5.1% and the between-assay CV was 14.3%. To adjust for total urinary  
8  
9 volume, we used the UIC adjusted for creatinine levels (UIC/creatinine). We defined low UIC as  
10  
11 values <150 µg/g creatinine. To assess the iodine status of a population, the median (not the  
12  
13 mean) urinary iodine concentration is recommended, as urinary iodine concentrations are  
14  
15 influenced by recent iodine intake. For pregnant populations, the median urinary iodine levels of  
16  
17 <150 µg/l are considered as insufficient, 150–249 µg/l as adequate and >500 µg/l as  
18  
19 excessive.[3]  
20  
21

22  
23 At the age of six (mean age=6.0±0.3 years), the children were invited to visit the Generation R  
24  
25 research centre. During this visit, children's nonverbal IQ and language comprehension were  
26  
27 assessed using validated Dutch test batteries: two subtests of the Snijders-Oomen Niet-verbale  
28  
29 intelligentie Test–Revisie (SON-R 2½-7) and the receptive subtest of the Taaltest voor Kinderen  
30  
31 (TvK).[10,11]  
32  
33

34  
35 The subtests of SON-R 2½-7 were Mosaics (assesses spatial visualization abilities), and  
36  
37 Categories (assesses abstract reasoning abilities). Raw test scores were converted into  
38  
39 nonverbal IQ scores using norms tailored to exact age. For the receptive subtest of the TvK, the  
40  
41 children were given 26 test items, and for each item, they had to choose the best picture that  
42  
43 matched the given words. We added the total correct answers for each child and divided this  
44  
45 sum by the total number of items answered, yielding a percentage correct score. The correlation  
46  
47 between nonverbal IQ and language comprehension scores was  $r=0.42$  ( $p<0.001$ ).  
48  
49

50  
51 Information on birth date, sex, and birth weight was obtained from registries. Gestational age at  
52  
53 birth was established using an ultrasound examination during pregnancy. Birth order, parental  
54  
55 age and education, marital status, ethnicity, household income, and history of smoking, as well  
56  
57  
58  
59  
60

## Maternal iodine in pregnancy and children's cognition

1  
2  
3 as child's history of breastfeeding were assessed by questionnaires. Child's ethnic background  
4  
5 was defined based on the country of birth of both parents. Maternal education was defined by  
6  
7 the highest completed education. Maternal smoking was assessed at enrolment and in mid and  
8  
9 late pregnancy. Maternal weight and length were measured at enrolment and were used to  
10  
11 calculate body mass index (BMI). In early pregnancy, maternal folate concentrations were  
12  
13 analysed in plasma samples by using an immunoelectrochemiluminescence assay on the  
14  
15 Architect System (Abbott Diagnostics BV). We used the Brief Symptom Inventory, a validated  
16  
17 self-report questionnaire, to measure maternal psychopathology during pregnancy. In early  
18  
19 pregnancy, maternal thyroid parameters [Thyroid Stimulating Hormone (TSH) and free  
20  
21 thyroxine] were measured in the blood.[12] Maternal nonverbal IQ was assessed during the  
22  
23 child's visit to the research center, using a computerized version of the Ravens Advanced  
24  
25 Progressive Matrices Test, set I.[13]  
26  
27  
28  
29

### 30 **Statistical Analyses**

31  
32  
33 Mother-child pairs with data on UIC and one or more cognitive measures were included in the  
34  
35 analyses. The percentage of missing data for covariates were below 10% except for maternal  
36  
37 psychopathology during pregnancy (17%), household income (17%), paternal education (32%),  
38  
39 and child's history of breastfeeding (13%). Missing values were imputed using multiple  
40  
41 imputations. Thirty copies of the original data set were generated with missing values replaced  
42  
43 by values randomly generated from the predictive distribution, on the basis of the correlation  
44  
45 between the variables.  
46  
47  
48

49  
50 Maternal low UIC during early pregnancy was the determinant in all analyses. We used linear  
51  
52 regression to examine the relation between maternal low UIC and children's nonverbal IQ and  
53  
54 language comprehension scores. Language comprehension scores were log-transformed to  
55  
56 meet the assumption of normality. To facilitate the interpretation of findings, we also used  
57  
58  
59  
60

## Maternal iodine in pregnancy and children's cognition

1  
2  
3 logistic regression to explore whether maternal low UIC was related to the odds of having a  
4 nonverbal IQ or language comprehension score in the lowest quartile of the sample (nonverbal  
5 IQ<93 and language comprehension score<0.77). Potential confounders were selected on the  
6 basis of background knowledge.[6,7] The relation between maternal UIC and children's  
7 cognition was examined in three steps: *model 1*, univariate association; *model 2*, adjusted for  
8 the child's sex and age, and maternal age and education; *model 3* additionally adjusted for a  
9 child's ethnic background, birth order, history of breastfeeding at age six months, paternal age,  
10 maternal body mass index (BMI), maternal history of smoking, maternal IQ, marital status,  
11 paternal education, maternal psychopathology in pregnancy, maternal folate concentration in  
12 early pregnancy, household income, and time of urine sampling in pregnancy. We additionally  
13 adjusted the models for maternal thyroid parameters.  
14  
15  
16  
17  
18  
19  
20  
21  
22  
23  
24  
25  
26

**RESULTS**

27  
28  
29  
30  
31 Our results showed that Generation R participants were iodine sufficient, with median  
32 UIC=229.6  $\mu\text{g/l}$  (90% range 55.2, 732.6) [iodine to creatinine ratio 296.5  $\mu\text{g/g creatinine}$  (90%  
33 range 112.8, 710.2)]. In total, 188 pregnant women (12.3%) had UIC<150  $\mu\text{g/g creatinine}$ ; only  
34 four pregnant women had UIC<50  $\mu\text{g/g creatinine}$ . Iodine status of the mother in pregnancy was  
35 associated with maternal age, BMI, education, psychopathology scores in pregnancy, marital  
36 status, and plasma folate levels in pregnancy (Table 1).  
37  
38  
39  
40  
41  
42  
43  
44  
45  
46  
47  
48  
49  
50  
51  
52  
53  
54  
55  
56  
57  
58  
59  
60

## Maternal iodine in pregnancy and children's cognition

**Table 1** Baseline characteristics (n=1525)

|                                                 | Urinary Iodine Concentration (UIC) |                  |        |
|-------------------------------------------------|------------------------------------|------------------|--------|
|                                                 | adjusted for creatinine levels     |                  |        |
|                                                 | <150 µg/g                          | >150 µg/g        | p      |
| <b>Maternal characteristics</b>                 |                                    |                  |        |
| Age at enrolment, years                         | 30.8 (4.6)                         | 28.6 (5.3)       | <0.001 |
| Body mass index at enrolment                    | 24.4 (4.3)                         | 25.3 (5.1)       | 0.01   |
| Education, %                                    |                                    |                  |        |
| Primary                                         | 18.2                               | 27.5             |        |
| Secondary                                       | 54.3                               | 52.2             | 0.01   |
| Higher education                                | 27.5                               | 20.3             |        |
| Psychopathology score in pregnancy              | 0.14 (0.00-1.02)                   | 0.21 (0.02-1.31) | <0.001 |
| Smoking, %                                      |                                    |                  |        |
| Never                                           | 78.6                               | 73.1             |        |
| Stopped when pregnant                           | 8.5                                | 10.8             | 0.24   |
| Continued in pregnancy                          | 12.9                               | 16.1             |        |
| Household income                                |                                    |                  |        |
| <€1200                                          | 6.7                                | 11.5             |        |
| >€1200 & <€2000                                 | 14.3                               | 13.4             | 0.10   |
| >€2000                                          | 79.0                               | 75.1             |        |
| Marital status, married/with partner %          | 90.4                               | 78.9             | <0.001 |
| Folate concentration in early pregnancy, nmol/L | 19.2 (9.2)                         | 17.2 (8.2)       | 0.004  |
| Free thyroxine in early pregnancy, pmol/L       | 15.28 (0.22)                       | 14.94 (0.09)     | 0.15   |

## Maternal iodine in pregnancy and children's cognition

|                                                      |                     |                    |        |
|------------------------------------------------------|---------------------|--------------------|--------|
| Thyroid Stimulating Hormone in early pregnancy, mU/l | 1.44 (0.08)         | 1.56 (0.04)        | 0.20   |
| Maternal IQ score                                    | 97 (79-113)         | 97 (80-113)        | 0.14   |
| UIC adjusted for creatinine                          | 322.9 (168.6-732.2) | 119.3 (65.5-147.1) | <0.001 |
| Gestational age at urine sampling                    | 13.1 (10.5-16.8)    | 12.9 (10.2-16.5)   | 0.55   |
| <b>Paternal characteristics</b>                      |                     |                    |        |
| Age at enrolment, yr                                 | 33.5 (5.8)          | 31.9 (6.2)         | <0.001 |
| Education, %                                         |                     |                    |        |
| Primary                                              | 16.6                | 19.8               |        |
| Secondary                                            | 46.6                | 51.3               | 0.23   |
| High                                                 | 36.8                | 28.9               |        |
| <b>Child characteristics</b>                         |                     |                    |        |
| Age at visit, years                                  | 5.9 (0.2)           | 5.9 (0.2)          | 1.00   |
| Sex, boy %                                           | 48.8                | 49.5               | 0.87   |
| First born %                                         | 59.1                | 62.0               | 0.44   |
| Ethnic background %                                  |                     |                    |        |
| Dutch                                                | 57.5                | 57.2               |        |
| Other Western                                        | 8.7                 | 7.0                | 0.67   |
| Non-Western                                          | 33.8                | 35.8               |        |
| Birth weight                                         | 3441 (521)          | 3419 (493)         | 0.60   |
| Gestational age at birth                             | 40.3 (37.4-42.1)    | 40.3 (37.2-41.9)   | 0.90   |
| Breastfeeding at 6 months, yes                       | 35.6                | 26.7               | 0.03   |
| IQ scores at 6 years                                 | 102 (15)            | 100 (16)           | 0.12   |
| Language comprehension score at 6 years              | 0.85 (0.62-0.96)    | 0.85 (0.61-0.96)   | 0.87   |

## Maternal iodine in pregnancy and children's cognition

1  
2  
3 Numbers are mean (*SD*) for variables with normal distribution, median (90% range) for not-normally  
4 distributed variables, and percentages for categorical variables.  
5  
6  
7

8 Table 2 represents the association between maternal iodine status in pregnancy and children's  
9 cognition at age six years. After adjustment for possible confounders, we did not find a relation  
10 between maternal low UIC and children's nonverbal IQ or language comprehension. Additional  
11 adjustment of the models for maternal thyroid parameters did not change the results (*B*  
12 additionally adjusted for maternal TSH=-0.87, 95%*CI*: -3.32, 1.45; *B* additionally adjusted for  
13 maternal free thyroxine=-0.86, 95%*CI*: -3.19, 1.47).  
14  
15  
16  
17  
18  
19  
20  
21  
22  
23  
24  
25  
26  
27  
28  
29  
30  
31  
32  
33  
34  
35  
36  
37  
38  
39  
40  
41  
42  
43  
44  
45  
46  
47  
48  
49  
50  
51  
52  
53  
54  
55  
56  
57  
58  
59  
60

**Table 2** Maternal Urinary Iodine Concentration (UIC) adjusted for creatinine levels and children's nonverbal IQ and language comprehension at age 6 years.

|                         | Nonverbal IQ<br>(n=1450)  |                         | Language comprehension<br>(n=1319) |                         |
|-------------------------|---------------------------|-------------------------|------------------------------------|-------------------------|
|                         | Score                     | Suboptimum (n=351)      | Score                              | Suboptimum<br>(n=323)   |
| <b>Determinant:</b>     | <i>B (95%CI), p</i>       | <i>OR (95%CI), p</i>    | <i>B (95%CI), p</i>                | <i>OR (95%CI), p</i>    |
| <b>UIC &lt;150 µg/g</b> |                           |                         |                                    |                         |
| Model 1                 | -2.16 (-4.52, 0.19), 0.07 | 1.44 (1.02, 2.02), 0.04 | -0.01 (-0.03, 0.02), 0.67          | 1.03 (0.71, 1.51), 0.86 |
| Model 2                 | -0.65 (-2.93, 1.63), 0.58 | 1.21 (0.85, 1.73), 0.30 | 0.01 (-0.01, 0.03), 0.44           | 0.85 (0.57, 1.27), 0.42 |
| Model 3                 | -0.86 (-3.10, 1.38), 0.45 | 1.33 (0.92, 1.92), 0.13 | 0.004 (-0.02, 0.03), 0.72          | 0.82 (0.56, 1.19), 0.82 |

Suboptimum nonverbal IQ: score in the lowest quartile (IQ scores <93).

Language score was log-transformed to satisfy the assumption of normality.

Suboptimum language comprehension: scores in the lowest quartile (language comprehension scores <0.77).

*Model 1:* unadjusted

*Model 2:* adjusted for child's sex and age at the time of cognitive assessment, maternal age and maternal educational levels

*Model 3:* adjusted for child's sex and age at the time of cognitive assessment, ethnic background, birth order, and history of breastfeeding at age six months, and parental age at the time of pregnancy, maternal body mass index, maternal history of smoking, maternal IQ, marital status, parental educational levels, maternal psychopathology in pregnancy, maternal folate concentration in early pregnancy, household income, and time of urine sampling in pregnancy

## Maternal iodine in pregnancy and children's cognition

**DISCUSSION**

Convincing evidence from randomized controlled trials in severe iodine deficient countries has shown the effectiveness of iodine fortification policies or supplementation in pregnant women. However, the existing evidence on the effectiveness of intervention in mild-to-moderate iodine deficient areas is very limited with regard to an improvement in neurocognitive outcomes in children.[14] The present study, performed in an iodine sufficient country, showed no clear relation between maternal low UIC in early pregnancy and children's nonverbal IQ or language comprehension at age six years. There are several possible explanations for this finding. First, this study was performed in the Netherlands, which has a population with an adequate dietary iodine intake.[15] Also, the median UIC in Generation R participants was much higher than the values reported in pregnant women of other populations (median UIC in this study=296.5  $\mu\text{g/g}$  creatinine, median UIC in the British study=110  $\mu\text{g/g}$  creatinine).[6,7] Even, the median UIC levels in the 'low' group of Generation R (median=119.3  $\mu\text{g/g}$  creatinine) was higher than the median UIC in the total sample of previous studies. These levels document that the Generation R multi-ethnic urban sample is iodine sufficient. Furthermore, many pregnant women of our sample may have been mostly iodine sufficient during the period of preconception or early postnatal phase, despite the fact that we observed a spot UIC lower than 150  $\mu\text{g/g}$  creatinine in pregnancy. Single measurement of urinary iodine is a good reflection of iodine status of a population, but may not necessarily reflect the iodine status of the individual. A second possible explanation is that the effect of iodine deficiency on child's neurodevelopment may be – to some extent – specific to verbal and reading abilities, and less apparent in nonverbal skills. In the Generation R Study, we previously showed that low maternal UIC was related to poor working memory in children, but to not planning/organization.[16] The absence of any relation between maternal low iodine and cognitive aspects of executive function, in particular planning/organization, is in line with the findings of the present study. The mechanisms through



## Maternal iodine in pregnancy and children's cognition

1  
2  
3 which mild iodine insufficiency influences other aspects of child neurodevelopment, such as  
4  
5 working memory, are not clear. Third, despite a larger sample size compared to the British or  
6  
7 Australian studies, the present study had a smaller group of women with UIC<150  $\mu\text{g/g}$   
8  
9 creatinine (188 women in the present study and 646 women in the British study). Because mild  
10  
11 iodine deficiency is less prevalent in our sample, it is possible that we did not have the power to  
12  
13 detect a significant association between maternal low UIC and children's cognitive delay.  
14  
15 However, the observed effect sizes for low UIC in the present study (e.g.  $OR=1.33$ ,  $95\%CI$ :  
16  
17  $0.92-1.92$  for suboptimum nonverbal IQ) were very similar to those of the British study  
18  
19 ( $OR=1.35$ ,  $95\%CI$ :  $0.93-1.94$ ) for the comparable measure but did not reach the significance  
20  
21 level in either study.  
22  
23  
24

25  
26 The infrequent occurrence of maternal low UIC during pregnancy and the lack of a clear  
27  
28 association with children's cognitive abilities likely reflect the Dutch government's iodine  
29  
30 fortification policy, which allows adding iodized salt to almost all processed food and  
31  
32 emphasizes the monitoring of iodine intake in the population. In case of non-optimal intake at  
33  
34 the population level, governmental measures are taken to boost the supply of iodine in the  
35  
36 population.<sup>15]</sup> This suggests that iodine fortification programmes can prevent adverse  
37  
38 neurodevelopmental outcomes in children.  
39  
40  
41  
42  
43  
44  
45  
46  
47  
48  
49  
50  
51  
52  
53  
54  
55  
56  
57  
58  
59  
60

**ACKNOWLEDGEMENT**

The Generation R Study is conducted by the Erasmus Medical Centre in close collaboration with the Municipal Health Service Rotterdam area, Rotterdam, the Rotterdam Homecare Foundation, Rotterdam and the Stichting Trombosedienst & Artsenlaboratorium Rijnmond (STAR-MDC), Rotterdam. We gratefully acknowledge the contribution of children and parents, general practitioners, hospitals, midwives and pharmacies in Rotterdam. The work of Dr Tiemeier and Dr Ghassabian was supported by a research grant from the European Community's 7th Framework Programme (FP7/2008–2013) under grant agreement 212652 (NUTRIMENTHE project, "The Effect of Diet on the Mental Performance of Children").

**CONTRIBUTORSHIP STATEMENT**

*Design:* Jaddoe, Hofman, Verhulst, White, and Tiemeier

*Acquisition of the data:* Ghassabian, Alec Ross, and Tiemeier

*Analysis of the data:* Ghassabian and Tiemeier

*Interpretation of the data:* Ghassabian, Steenweg - de Graaff, Peeters, White, and Tiemeier

*Drafting the article:* Ghassabian and Tiemeier

*Critical revision of the manuscript for important intellectual content:* Ghassabian, Steenweg - de Graaff Peeters, Alec Ross, Jaddoe, Hofman, Verhulst, White, and Tiemeier

**COMPETING OF INTEREST**

The authors have nothing to disclose.

**FUNDING**

The Generation R Study is conducted by the Erasmus Medical Centre in close collaboration with the Municipal Health Service Rotterdam area, Rotterdam, the Rotterdam Homecare Foundation, Rotterdam and the Stichting Trombosedienst & Artsenlaboratorium Rijnmond (STAR-MDC), Rotterdam. The work of Dr Tiemeier and Dr Ghassabian was supported by a

## Maternal iodine in pregnancy and children's cognition

1  
2  
3 research grant from the European Community's 7th Framework Programme (FP7/2008–2013)  
4  
5 under grant agreement 212652 (NUTRIMENTHE project, “The Effect of Diet on the Mental  
6  
7 Performance of Children”).  
8  
9

**DATA SHARING STATEMENT**

10  
11  
12  
13  
14  
15 No additional data available.  
16  
17  
18  
19  
20  
21  
22  
23  
24  
25  
26  
27  
28  
29  
30  
31  
32  
33  
34  
35  
36  
37  
38  
39  
40  
41  
42  
43  
44  
45  
46  
47  
48  
49  
50  
51  
52  
53  
54  
55  
56  
57  
58  
59  
60

## Maternal iodine in pregnancy and children's cognition

## REFERENCES

1. Zimmermann MB, Jooste PL, Pandav CS. Iodine-deficiency disorders. *Lancet* 2008;372(9645):1251-1262.
2. Pearce E N, Andersson M, Zimmermann MB. Global iodine nutrition: Where do we stand in 2013? *Thyroid* 2013;23:523-528.
3. Stagnaro-Green A, Abalovich M, Alexander E, et al. Guidelines of the American Thyroid Association for the diagnosis and management of thyroid disease during pregnancy and postpartum. *Thyroid*. 2011;21:1081-1125.
4. De Groot L, Abalovich M, Alexander EK, et al. Management of thyroid dysfunction during pregnancy and postpartum: an Endocrine Society clinical practice guideline. *J Clin Endocrinol Metab* 2012;97:2543-2565.
5. Zhou SJ, Anderson AJ, Gibson RA, et al. Effect of iodine supplementation in pregnancy on child development and other clinical outcomes: a systematic review of randomized controlled trials. *Am J Clin Nutr* 2013;98:1241-1254.
6. Bath SC, Steer CD, Golding J, et al. Effect of inadequate iodine status in UK pregnant women on cognitive outcomes in their children: results from the Avon Longitudinal Study of Parents and Children (ALSPAC). *Lancet* 2013;382:331-337.
7. Hynes KL, Otahal P, Hay I, et al. Mild iodine deficiency during pregnancy is associated with reduced educational outcomes in the offspring: 9-year follow-up of the gestational iodine cohort. *J Clin Endocrinol Metab* 2013;98:1954-1962.
8. Vejbjerg P, Knudsen N, Perrild H, et al. Estimation of iodine intake from various urinary iodine measurements in population studies. *Thyroid* 2009;19:1281-1286.
9. Jaddoe VW, van Duijn CM, Franco OH, et al. The Generation R Study: design and cohort update 2012. *Eur J Epidemiol* 2012;27:739-756.
10. Tellegen PJ, Winkel M, Wijnberg-Williams B, et al. *Snijders-Oomen Niet-Verbale Intelligentietest: SON-R 2 ½ -7*. Amsterdam: Boom Testuitgevers; 2005.
11. Bon WHJ, van. *Taaltests voor Kinderen*. Lisse: Swets & Zeitlinger; 1982.
12. Ghassabian A, Bongers-Schokking JJ, Henrichs J, et al. Maternal thyroid function during pregnancy and behavioral problems in the offspring: the generation R study. *Pediatr Res* 2011;69:454-459.
13. Prieler J. *Raven's advanced progressive matrices, vol 24.00*. Schufried, Mödling, Austria; 2003.

## Maternal iodine in pregnancy and children's cognition

1  
2  
3 14. Taylor PN, Okosieme OE, Dayan CM, et al. Therapy of endocrine disease: Impact of  
4 iodine supplementation in mild-to-moderate iodine deficiency: systematic review and meta-  
5 analysis. Eur J Endocrinol;170(1):R1-R15.  
6  
7

8 15. National Institute for Public Health and the Environment. The iodine intake of children  
9 and adults in the Netherlands : Results of the Dutch National Food Consumption Survey 2007-  
10 2010. 2012;  
11 [http://www.rivm.nl/en/Documents\\_and\\_publications/Scientific/Reports/2012/april/The\\_iodine\\_intake\\_of\\_children\\_and\\_adults\\_in\\_the\\_Netherlands\\_Results\\_of\\_the\\_Dutch\\_National\\_Food\\_Consumption\\_Survey\\_2007\\_2010](http://www.rivm.nl/en/Documents_and_publications/Scientific/Reports/2012/april/The_iodine_intake_of_children_and_adults_in_the_Netherlands_Results_of_the_Dutch_National_Food_Consumption_Survey_2007_2010). Date accessed 2014-03-05.  
12  
13  
14  
15

16 16. van Mil NH, Tiemeier H, Bongers-Schokking JJ, et al. Low urinary iodine excretion  
17 during early pregnancy is associated with alterations in executive functioning in children. J Nutr  
18 2012;142:2167-2174.  
19  
20  
21  
22  
23  
24  
25  
26  
27  
28  
29  
30  
31  
32  
33  
34  
35  
36  
37  
38  
39  
40  
41  
42  
43  
44  
45  
46  
47  
48  
49  
50  
51  
52  
53  
54  
55  
56  
57  
58  
59  
60

## Maternal iodine in pregnancy and children's cognition

1  
2  
3  
4  
5  
6  
7  
8  
9  
10  
11  
12  
13  
14  
15  
16  
17  
18  
19  
20  
21  
22  
23  
24  
25  
26  
27  
28  
29  
30  
31  
32  
33  
34  
35  
36  
37  
38  
39  
40  
41  
42  
43  
44  
45  
46  
47  
48  
49  
50  
51  
52  
53  
54  
55  
56  
57  
58  
59  
60

What is already known on this subject?

Severe iodine deficiency, one of the major preventable causes of mental retardation worldwide, is a rare condition due to the iodine fortification of salt in many countries. Nevertheless, mild iodine deficiency is still considered a major public health concern, even in some developed countries. Reports from populations with an insufficient iodine intake suggest that children of mothers with mild iodine deficiency during pregnancy are at risk for cognitive impairments.

What this study adds?

The present study, performed in a country with optimal iodine intake, showed no clear relation between maternal relatively low urinary iodine concentration in early pregnancy and children's nonverbal IQ or language comprehension at age six years. The lack of a clear association with children's cognitive abilities likely reflect the Dutch iodine fortification policy, which allows adding iodized salt to almost all processed food and emphasizes the monitoring of iodine intake in the population. In case of non-optimal intake, measures would be taken to boost the supply of iodine in the population. This suggests that iodine fortification programmes can prevent adverse neurodevelopmental outcomes in children.

**Maternal urinary iodine concentration in pregnancy and children's cognition: Results from a population-based birth cohort in an iodine-sufficient area**

Akhgar Ghassabian<sup>1,2</sup>, Jolien Steenweg-de Graaff<sup>1,2</sup>, Robin P Peeters<sup>3,4</sup>, H Alec Ross<sup>5</sup>, Vincent W Jaddoe<sup>2,6,7</sup>, Albert Hofman<sup>7</sup>, Frank C Verhulst<sup>1</sup>, Tonya White<sup>1,8</sup>, and Henning Tiemeier<sup>1,7,9</sup>

<sup>1</sup>Department of Child and Adolescent Psychiatry, Erasmus Medical Centre – Sophia Children's Hospital, Rotterdam, the Netherlands

<sup>2</sup>The Generation R Study Group, Erasmus Medical Centre, Rotterdam, the Netherlands

<sup>3</sup>Department of Internal Medicine, Erasmus Medical Centre, Rotterdam, the Netherlands

<sup>4</sup>Rotterdam Thyroid Centre, Erasmus Medical Centre, Rotterdam, the Netherlands

<sup>5</sup>Department of Laboratory Medicine, Radboud University Nijmegen Medical Centre, Nijmegen, the Netherlands

<sup>6</sup>Department of Paediatrics, Erasmus Medical Centre – Sophia Children's Hospital, the Netherlands

<sup>7</sup>Department of Epidemiology, Erasmus Medical Centre, Rotterdam, the Netherlands

<sup>8</sup>Department of Radiology, Erasmus Medical Centre, Rotterdam, the Netherlands

<sup>9</sup>Department of Psychiatry, Erasmus Medical Centre, Rotterdam, the Netherlands

**Correspondence to** Akhgar Ghassabian, MD, PhD, Department of Child and Adolescent Psychiatry/Psychology, Erasmus Medical Centre–Sophia Children's Hospital, P.O. Box 2060, 3000 CB Rotterdam, the Netherlands. Tel: (+31) 10-703 8490, Fax: (+31) 10-704 3447, email: a.ghassabian@erasmusmc.nl

**Key words:** iodine, pregnancy, cognition

**Manuscript word count:** 2001

**Abstract word counts:** 289

**Number of tables:** 2

**Number of references:** 16

**CONTRIBUTORSHIP STATEMENT**

*Design:* Jaddoe, Hofman, Verhulst, White, and Tiemeier

*Acquisition of the data:* Ghassabian, Alec Ross, and Tiemeier

*Analysis of the data:* Ghassabian and Tiemeier

*Interpretation of the data:* Ghassabian, Steenweg - de Graaff, Peeters, White, and Tiemeier

*Drafting the article:* Ghassabian and Tiemeier

*Critical revision of the manuscript for important intellectual content:* Ghassabian, Steenweg - de Graaff Peeters, Alec Ross, Jaddoe, Hofman, Verhulst, White, and Tiemeier

**COMPETING OF INTEREST**

The authors have nothing to disclose.

**FUNDING**

The Generation R Study is conducted by the Erasmus Medical Centre in close collaboration with the Municipal Health Service Rotterdam area, Rotterdam, the Rotterdam Homecare Foundation, Rotterdam and the Stichting Trombosedienst & Artsenlaboratorium Rijnmond (STAR-MDC), Rotterdam. The work of Dr Tiemeier and Dr Ghassabian was supported by a research grant from the European Community's 7th Framework Programme (FP7/2008–2013) under grant agreement 212652 (NUTRIMENTHE project, "The Effect of Diet on the Mental Performance of Children").

**DATA SHARING STATEMENT**

No additional data available.



**ABSTRACT**

**Objectives.** Reports from populations with an insufficient iodine intake suggest that children of mothers with mild iodine deficiency during pregnancy are at risk for cognitive impairments. However, it is unknown whether, even in iodine sufficient areas, low levels of iodine intake occur that influence cognitive development in the offspring. This study investigated the association between maternal low urinary iodine concentration (UIC) in pregnancy and children's cognition in a population-based sample from a country with an optimal iodine status (the Netherlands).

**Setting and participants.** In 1525 mother-child pairs in a Dutch multi-ethnic birth cohort, we investigated the relation between maternal UIC < 150 µg/g creatinine, assessed < 18 weeks gestation, and children's cognition.

**Outcomes measures.** Nonverbal IQ and language comprehension was assessed during a visit to the research centre using Dutch test batteries when the children were six years.

**Results.** In total, 188 (12.3%) pregnant women had UIC < 150 µg/g creatinine, with a median UIC equals to 119.3 µg/g creatinine. The median UIC in the group with UIC > 150 µg/g creatinine was 322.9 µg/g and in the whole sample 296.5 µg/g creatinine. There was a univariate association between maternal low UIC and children's suboptimum nonverbal IQ (unadjusted OR=1.44, 95%CI: 1.02-2.02). However, after adjustment for confounders, maternal low UIC was not associated with children's nonverbal IQ (adjusted OR=1.33, 95%CI 0.92-1.93). There was no relation between maternal UIC in early pregnancy and children's language comprehension at six years.

**Conclusion.** The lack of a clear association between maternal low UIC and children's cognition probably reflects that low levels of iodine were not frequent and severe as to affect neurodevelopment. This may result from the Dutch iodine fortification policy, which allows

## Maternal iodine in pregnancy and children's cognition

1  
2  
3 adding iodized salt to almost all processed food and emphasizes the monitoring of iodine intake  
4  
5 in the population.  
6  
7  
8  
9  
10  
11  
12  
13  
14  
15  
16  
17  
18  
19  
20  
21  
22  
23  
24  
25  
26  
27  
28  
29  
30  
31  
32  
33  
34  
35  
36  
37  
38  
39  
40  
41  
42  
43  
44  
45  
46  
47  
48  
49  
50  
51  
52  
53  
54  
55  
56  
57  
58  
59  
60

For peer review only

**ARTICLE SUMMARY: STRENGTHS AND LIMITATIONS OF THIS STUDY**

- The present study is performed in 1525 mother-child pairs from a country with optimal iodine intake (the Netherlands).
- In total, 188 pregnant women (12.3%) had UIC<150  $\mu\text{g/g}$  creatinine in early pregnancy.
- In this prospective study, there was no clear relation between maternal relatively low urinary iodine concentration and children's nonverbal IQ or language comprehension at age six years.
- Because mild iodine deficiency was not prevalent in our sample, it is possible that we did not have the power to detect a significant association between maternal low urinary iodine concentration and children's cognitive delay.
- The lack of a clear association with children's cognitive abilities likely reflects fortification policy in the Netherlands, which allows adding iodized salt to almost all processed food and emphasizes the monitoring of iodine intake in the population.

## Maternal iodine in pregnancy and children's cognition

**INTRODUCTION**

Iodine is an essential micronutrient required for thyroid hormone production. Severe iodine deficiency is one of the major preventable causes of mental retardation worldwide.[1] Due to the iodine fortification of salt in many countries, severe iodine deficiency is a rare condition.[2] Nevertheless, mild-to-moderate iodine deficiency is still considered a major public health concern, even in some developed countries.[2]

Pregnant women are particularly susceptible to iodine deficiency because of higher requirement during pregnancy.[3] Guidelines recommend an almost 2-fold increase in dietary iodine intake during pregnancy to maintain optimal thyroid hormone production in both mother and foetus.[3,4] Randomized trials of iodine supplementation in pregnant women from regions with severe iodine deficiency confirmed the effect of maternal severe iodine deficiency on children's cognitive development.[5] Recently, an observational study by Bath et al. in UK ( $n=1040$ ) showed that the children born to mothers with mild-to-moderate iodine deficiency were at risk of impairments in nonverbal IQ and reading skills.[6] In this study, mild-to-moderate iodine deficiency was defined as having urinary iodine concentration (UIC) lower than  $150 \mu\text{g/g}$  of creatinine on the basis of World Health Organization criteria.[3] Similarly, in 228 mother-child pairs in Australia, Hynes et al. found a relation between maternal mild iodine deficiency ( $\text{UIC} < 150 \mu\text{g/L}$ ) and standardized academic test score, e.g. spelling errors, in children.[7] Both UK and Australia are considered mild-to-moderate iodine deficient countries by International Council for Control of Iodine Deficiency Disorders (ICCIDD).[2] However, it is unclear if relatively low levels of iodine intake during pregnancy also occur in countries with optimal iodine status, which affect cognitive development in the offspring.

The goal of this study was to investigate the association between maternal low UIC in pregnancy and children's cognition in a population-based sample from a country with an optimal

1  
2  
3 iodine status (the Netherlands).[2] UIC is a good marker of dietary iodine intake, and can be  
4  
5 assessed reliably in spot urine samples at the population level.[8] Adjustment of UIC for  
6  
7 creatinine levels decreases the intra-individual variability in iodine excretion, and provides a  
8  
9 more accurate estimate of iodine status in individuals compared to crude values.[8]  
10

## 11 12 13 **METHODS**

### 14 15 16 **Participants**

17  
18 This study was embedded within the Generation R Study, a population-based birth cohort in  
19  
20 Rotterdam, the Netherlands, which follows children from foetal life onwards.[9] The Medical  
21  
22 Ethics Committee of the Erasmus Medical Centre approved the study, and written informed  
23  
24 consent was obtained from parents. In total, 7145 pregnant women were recruited in early  
25  
26 pregnancy (gestational age < 18 weeks). All women had a delivery date between April 2002 and  
27  
28 January 2006. During early pregnancy, 2375 pregnant women provided urine samples. Urinary  
29  
30 iodine concentration was assessed in 2251 pregnant women with singleton live birth. In this  
31  
32 group, data on child cognitive measures were available in 1525 children at age six years. There  
33  
34 was no difference in maternal iodine levels between mother-child pairs included in the analyses  
35  
36 and those excluded because of missing data on child cognitive measures. Likewise,  
37  
38 demographic characteristics including maternal age and education, household income, or child's  
39  
40 characteristics such as gestational age at birth or ethnic background did not differ between  
41  
42 these two groups.  
43  
44  
45  
46  
47

### 48 **Measurements**

49  
50 During the first prenatal visit [mean gestational age = 13.28 (1.85), range 6.07-17.93 weeks],  
51  
52 maternal urine samples were collected at random times during the day. Urinary iodine was  
53  
54 measured by the ceri-arsenite reaction after digestion by means of ammonium persulfate. After  
55  
56 brief centrifugation, sodium arsenite solution (0.1 mol/L in 1 mol/L of sulphuric acid) was added.  
57  
58  
59  
60

## Maternal iodine in pregnancy and children's cognition

1  
2  
3 Subsequently, ceri-ammonium sulfate was added, and color was allowed to develop at 250°C  
4  
5 over 60 min. Optical density was assessed at 405 nm. At a concentration of 1.7  $\mu\text{mol/L}$  iodine  
6  
7 the within-assay CV was 5.1% and the between-assay CV was 14.3%. To adjust for total urinary  
8  
9 volume, we used the UIC adjusted for creatinine levels (UIC/creatinine). We defined low UIC as  
10  
11 values  $<150 \mu\text{g/g}$  creatinine. To assess the iodine status of a population, the median (not the  
12  
13 mean) urinary iodine concentration is recommended, as urinary iodine concentrations are  
14  
15 influenced by recent iodine intake. For pregnant populations, the median urinary iodine levels of  
16  
17  $<150 \mu\text{g/l}$  are considered as insufficient, 150–249  $\mu\text{g/l}$  as adequate and  $>500 \mu\text{g/l}$  as  
18  
19 excessive.[3]  
20  
21

22  
23 At the age of six (mean age= $6.0\pm 0.3$  years), the children were invited to visit the Generation R  
24  
25 research centre. During this visit, children's nonverbal IQ and language comprehension were  
26  
27 assessed using validated Dutch test batteries: two subtests of the Snijders-Oomen Niet-verbale  
28  
29 intelligentie Test–Revisie (SON-R 2½-7) and the receptive subtest of the Taaltest voor Kinderen  
30  
31 (TvK).[10,11]  
32  
33

34  
35 The subtests of SON-R 2½-7 were Mosaics (assesses spatial visualization abilities), and  
36  
37 Categories (assesses abstract reasoning abilities). Raw test scores were converted into  
38  
39 nonverbal IQ scores using norms tailored to exact age. For the receptive subtest of the TvK, the  
40  
41 children were given 26 test items, and for each item, they had to choose the best picture that  
42  
43 matched the given words. We added the total correct answers for each child and divided this  
44  
45 sum by the total number of items answered, yielding a percentage correct score. The correlation  
46  
47 between nonverbal IQ and language comprehension scores was  $r=0.42$  ( $p<0.001$ ).  
48  
49

50  
51 Information on birth date, sex, and birth weight was obtained from registries. Gestational age at  
52  
53 birth was established using an ultrasound examination during pregnancy. Birth order, parental  
54  
55 age and education, marital status, ethnicity, household income, and history of smoking, as well  
56  
57  
58  
59  
60

## Maternal iodine in pregnancy and children's cognition

1  
2  
3 as child's history of breastfeeding were assessed by questionnaires. Child's ethnic background  
4  
5 was defined based on the country of birth of both parents. Maternal education was defined by  
6  
7 the highest completed education. Maternal smoking was assessed at enrolment and in mid and  
8  
9 late pregnancy. Maternal weight and length were measured at enrolment and were used to  
10  
11 calculate body mass index (BMI). In early pregnancy, maternal folate concentrations were  
12  
13 analysed in plasma samples by using an immunoelectrochemiluminescence assay on the  
14  
15 Architect System (Abbott Diagnostics BV). We used the Brief Symptom Inventory, a validated  
16  
17 self-report questionnaire, to measure maternal psychopathology during pregnancy. In early  
18  
19 pregnancy, maternal thyroid parameters [Thyroid Stimulating Hormone (TSH) and free  
20  
21 thyroxine] were measured in the blood.[12] Maternal nonverbal IQ was assessed during the  
22  
23 child's visit to the research center, using a computerized version of the Ravens Advanced  
24  
25 Progressive Matrices Test, set I.[13]  
26  
27  
28  
29

### 30 Statistical Analyses

31  
32  
33 Mother-child pairs with data on UIC and one or more cognitive measures were included in the  
34  
35 analyses. The percentage of missing data for covariates were below 10% except for maternal  
36  
37 psychopathology during pregnancy (17%), household income (17%), paternal education (32%),  
38  
39 and child's history of breastfeeding (13%). Missing values were imputed using multiple  
40  
41 imputations. Thirty copies of the original data set were generated with missing values replaced  
42  
43 by values randomly generated from the predictive distribution, on the basis of the correlation  
44  
45 between the variables.  
46  
47  
48

49 Maternal low UIC during early pregnancy was the determinant in all analyses. We used linear  
50  
51 regression to examine the relation between maternal low UIC and children's nonverbal IQ and  
52  
53 language comprehension scores. Language comprehension scores were log-transformed to  
54  
55 meet the assumption of normality. To facilitate the interpretation of findings, we also used  
56  
57  
58  
59  
60

## Maternal iodine in pregnancy and children's cognition

1  
2  
3 logistic regression to explore whether maternal low UIC was related to the odds of having a  
4 nonverbal IQ or language comprehension score in the lowest quartile of the sample (nonverbal  
5 IQ<93 and language comprehension score<0.77). Potential confounders were selected on the  
6 basis of background knowledge.[6,7] The relation between maternal UIC and children's  
7 cognition was examined in three steps: *model 1*, univariate association; *model 2*, adjusted for  
8 the child's sex and age, and maternal age and education; *model 3* additionally adjusted for a  
9 child's ethnic background, birth order, history of breastfeeding at age six months, paternal age,  
10 maternal body mass index (BMI), maternal history of smoking, maternal IQ, marital status,  
11 paternal education, maternal psychopathology in pregnancy, maternal folate concentration in  
12 early pregnancy, household income, and time of urine sampling in pregnancy. We additionally  
13 adjusted the models for maternal thyroid parameters.

**RESULTS**

24  
25  
26  
27  
28  
29  
30  
31 Our results showed that Generation R participants were iodine sufficient, with median  
32 UIC=229.6  $\mu\text{g/l}$  (90% range 55.2, 732.6) [iodine to creatinine ratio 296.5  $\mu\text{g/g creatinine}$  (90%  
33 range 112.8, 710.2)]. In total, 188 pregnant women (12.3%) had UIC<150  $\mu\text{g/g creatinine}$ ; only  
34 four pregnant women had UIC<50  $\mu\text{g/g creatinine}$ . Iodine status of the mother in pregnancy was  
35 associated with maternal age, BMI, education, psychopathology scores in pregnancy, marital  
36 status, and plasma folate levels in pregnancy (Table 1).  
37  
38  
39  
40  
41  
42  
43  
44  
45  
46  
47  
48  
49  
50  
51  
52  
53  
54  
55  
56  
57  
58  
59  
60



**Table 1** Baseline characteristics (n=1525)

|                                                 | Urinary Iodine Concentration (UIC) |                  |        |
|-------------------------------------------------|------------------------------------|------------------|--------|
|                                                 | adjusted for creatinine levels     |                  |        |
|                                                 | <150 µg/g                          | >150 µg/g        | p      |
| <b>Maternal characteristics</b>                 |                                    |                  |        |
| Age at enrolment, years                         | 30.8 (4.6)                         | 28.6 (5.3)       | <0.001 |
| Body mass index at enrolment                    | 24.4 (4.3)                         | 25.3 (5.1)       | 0.01   |
| Education, %                                    |                                    |                  |        |
| Primary                                         | 18.2                               | 27.5             |        |
| Secondary                                       | 54.3                               | 52.2             | 0.01   |
| Higher education                                | 27.5                               | 20.3             |        |
| Psychopathology score in pregnancy              | 0.14 (0.00-1.02)                   | 0.21 (0.02-1.31) | <0.001 |
| Smoking, %                                      |                                    |                  |        |
| Never                                           | 78.6                               | 73.1             |        |
| Stopped when pregnant                           | 8.5                                | 10.8             | 0.24   |
| Continued in pregnancy                          | 12.9                               | 16.1             |        |
| Household income                                |                                    |                  |        |
| <€1200                                          | 6.7                                | 11.5             |        |
| >€1200 & <€2000                                 | 14.3                               | 13.4             | 0.10   |
| >€2000                                          | 79.0                               | 75.1             |        |
| Marital status, married/with partner %          | 90.4                               | 78.9             | <0.001 |
| Folate concentration in early pregnancy, nmol/L | 19.2 (9.2)                         | 17.2 (8.2)       | 0.004  |
| Free thyroxine in early pregnancy, pmol/L       | 15.28 (0.22)                       | 14.94 (0.09)     | 0.15   |

## Maternal iodine in pregnancy and children's cognition

|                                                      |                     |                    |        |
|------------------------------------------------------|---------------------|--------------------|--------|
| Thyroid Stimulating Hormone in early pregnancy, mU/l | 1.44 (0.08)         | 1.56 (0.04)        | 0.20   |
| Maternal IQ score                                    | 97 (79-113)         | 97 (80-113)        | 0.14   |
| UIC adjusted for creatinine                          | 322.9 (168.6-732.2) | 119.3 (65.5-147.1) | <0.001 |
| Gestational age at urine sampling                    | 13.1 (10.5-16.8)    | 12.9 (10.2-16.5)   | 0.55   |
| <b>Paternal characteristics</b>                      |                     |                    |        |
| Age at enrolment, yr                                 | 33.5 (5.8)          | 31.9 (6.2)         | <0.001 |
| Education, %                                         |                     |                    |        |
| Primary                                              | 16.6                | 19.8               |        |
| Secondary                                            | 46.6                | 51.3               | 0.23   |
| High                                                 | 36.8                | 28.9               |        |
| <b>Child characteristics</b>                         |                     |                    |        |
| Age at visit, years                                  | 5.9 (0.2)           | 5.9 (0.2)          | 1.00   |
| Sex, boy %                                           | 48.8                | 49.5               | 0.87   |
| First born %                                         | 59.1                | 62.0               | 0.44   |
| Ethnic background %                                  |                     |                    |        |
| Dutch                                                | 57.5                | 57.2               |        |
| Other Western                                        | 8.7                 | 7.0                | 0.67   |
| Non-Western                                          | 33.8                | 35.8               |        |
| Birth weight                                         | 3441 (521)          | 3419 (493)         | 0.60   |
| Gestational age at birth                             | 40.3 (37.4-42.1)    | 40.3 (37.2-41.9)   | 0.90   |
| Breastfeeding at 6 months, yes                       | 35.6                | 26.7               | 0.03   |
| IQ scores at 6 years                                 | 102 (15)            | 100 (16)           | 0.12   |
| Language comprehension score at 6 years              | 0.85 (0.62-0.96)    | 0.85 (0.61-0.96)   | 0.87   |

## Maternal iodine in pregnancy and children's cognition

1  
2  
3 Numbers are mean (*SD*) for variables with normal distribution, median (90% range) for not-normally  
4 distributed variables, and percentages for categorical variables.  
5  
6  
7

8 Table 2 represents the association between maternal iodine status in pregnancy and children's  
9 cognition at age six years. After adjustment for possible confounders, we did not find a relation  
10 between maternal low UIC and children's nonverbal IQ or language comprehension. Additional  
11 adjustment of the models for maternal thyroid parameters did not change the results (*B*  
12 additionally adjusted for maternal TSH=-0.87, 95%*CI*: -3.32, 1.45; *B* additionally adjusted for  
13 maternal free thyroxine=-0.86, 95%*CI*: -3.19, 1.47).  
14  
15  
16  
17  
18  
19  
20  
21  
22  
23  
24  
25  
26  
27  
28  
29  
30  
31  
32  
33  
34  
35  
36  
37  
38  
39  
40  
41  
42  
43  
44  
45  
46  
47  
48  
49  
50  
51  
52  
53  
54  
55  
56  
57  
58  
59  
60

## Maternal iodine in pregnancy and children's cognition

**Table 2** Maternal Urinary Iodine Concentration (UIC) adjusted for creatinine levels and children's nonverbal IQ and language comprehension at age 6 years.

|                         | Nonverbal IQ<br>(n=1450)  |                         | Language comprehension<br>(n=1319) |                         |
|-------------------------|---------------------------|-------------------------|------------------------------------|-------------------------|
|                         | Score                     | Suboptimum (n=351)      | Score                              | Suboptimum<br>(n=323)   |
| <b>Determinant:</b>     | <i>B (95%CI), p</i>       | <i>OR (95%CI), p</i>    | <i>B (95%CI), p</i>                | <i>OR (95%CI), p</i>    |
| <b>UIC &lt;150 µg/g</b> |                           |                         |                                    |                         |
| Model 1                 | -2.16 (-4.52, 0.19), 0.07 | 1.44 (1.02, 2.02), 0.04 | -0.01 (-0.03, 0.02), 0.67          | 1.03 (0.71, 1.51), 0.86 |
| Model 2                 | -0.65 (-2.93, 1.63), 0.58 | 1.21 (0.85, 1.73), 0.30 | 0.01 (-0.01, 0.03), 0.44           | 0.85 (0.57, 1.27), 0.42 |
| Model 3                 | -0.86 (-3.10, 1.38), 0.45 | 1.33 (0.92, 1.92), 0.13 | 0.004 (-0.02, 0.03), 0.72          | 0.82 (0.56, 1.19), 0.82 |

Suboptimum nonverbal IQ: score in the lowest quartile (IQ scores <93).

Language score was log-transformed to satisfy the assumption of normality.

Suboptimum language comprehension: scores in the lowest quartile (language comprehension scores <0.77).

*Model 1:* unadjusted

*Model 2:* adjusted for child's sex and age at the time of cognitive assessment, maternal age and maternal educational levels

*Model 3:* adjusted for child's sex and age at the time of cognitive assessment, ethnic background, birth order, and history of breastfeeding at age six months, and parental age at the time of pregnancy, maternal body mass index, maternal history of smoking, maternal IQ, marital status, parental educational levels, maternal psychopathology in pregnancy, maternal folate concentration in early pregnancy, household income, and time of urine sampling in pregnancy

## DISCUSSION

Convincing evidence from randomized controlled trials in severe iodine deficient countries has shown the effectiveness of iodine fortification policies or supplementation in pregnant women. However, the existing evidence on the effectiveness of intervention in mild-to-moderate iodine deficient areas is very limited with regard to an improvement in neurocognitive outcomes in children.[14] The present study, performed in an iodine sufficient country, showed no clear relation between maternal low UIC in early pregnancy and children's nonverbal IQ or language comprehension at age six years. There are several possible explanations for this finding. First, this study was performed in the Netherlands, which has a population with an adequate dietary iodine intake.[15] Also, the median UIC in Generation R participants was much higher than the values reported in pregnant women of other populations (median UIC in this study=296.5  $\mu\text{g/g}$  creatinine, median UIC in the British study=110  $\mu\text{g/g}$  creatinine).[6,7] Even, the median UIC levels in the 'low' group of Generation R (median=119.3  $\mu\text{g/g}$  creatinine) was higher than the median UIC in the total sample of previous studies. These levels document that the Generation R multi-ethnic urban sample is iodine sufficient. Furthermore, many pregnant women of our sample may have been mostly iodine sufficient during the period of preconception or early postnatal phase, despite the fact that we observed a spot UIC lower than 150  $\mu\text{g/g}$  creatinine in pregnancy. Single measurement of urinary iodine is a good reflection of iodine status of a population, but may not necessarily reflect the iodine status of the individual. A second possible explanation is that the effect of iodine deficiency on child's neurodevelopment may be – to some extent – specific to verbal and reading abilities, and less apparent in nonverbal skills. In the Generation R Study, we previously showed that low maternal UIC was related to poor working memory in children, but to not planning/organization.[16] The absence of any relation between maternal low iodine and cognitive aspects of executive function, in particular planning/organization, is in line with the findings of the present study. The mechanisms through

## Maternal iodine in pregnancy and children's cognition

1  
2  
3 which mild iodine insufficiency influences other aspects of child neurodevelopment, such as  
4  
5 working memory, are not clear. Third, despite a larger sample size compared to the British or  
6  
7 Australian studies, the present study had a smaller group of women with UIC<150 µg/g  
8  
9 creatinine (188 women in the present study and 646 women in the British study). Because mild  
10  
11 iodine deficiency is less prevalent in our sample, it is possible that we did not have the power to  
12  
13 detect a significant association between maternal low UIC and children's cognitive delay.  
14  
15 However, the observed effect sizes for low UIC in the present study (e.g. OR=1.33, 95%CI:  
16  
17 0.92-1.92 for suboptimum nonverbal IQ) were very similar to those of the British study  
18  
19 (OR=1.35, 95%CI: 0.93-1.94) for the comparable measure but did not reach the significance  
20  
21 level in either study.  
22  
23  
24  
25

26 The infrequent occurrence of maternal low UIC during pregnancy and the lack of a clear  
27  
28 association with children's cognitive abilities likely reflect the Dutch government's iodine  
29  
30 fortification policy, which allows adding iodized salt to almost all processed food and  
31  
32 emphasizes the monitoring of iodine intake in the population. In case of non-optimal intake at  
33  
34 the population level, governmental measures are taken to boost the supply of iodine in the  
35  
36 population.<sup>15</sup> This suggests that iodine fortification programmes can prevent adverse  
37  
38 neurodevelopmental outcomes in children.  
39  
40  
41  
42  
43  
44  
45  
46  
47  
48  
49  
50  
51  
52  
53  
54  
55  
56  
57  
58  
59  
60

**ACKNOWLEDGEMENT**

The Generation R Study is conducted by the Erasmus Medical Centre in close collaboration with the Municipal Health Service Rotterdam area, Rotterdam, the Rotterdam Homecare Foundation, Rotterdam and the Stichting Trombosedienst & Artsenlaboratorium Rijnmond (STAR-MDC), Rotterdam. We gratefully acknowledge the contribution of children and parents, general practitioners, hospitals, midwives and pharmacies in Rotterdam. The work of Dr Tiemeier and Dr Ghassabian was supported by a research grant from the European Community's 7th Framework Programme (FP7/2008–2013) under grant agreement 212652 (NUTRIMENTHE project, "The Effect of Diet on the Mental Performance of Children").

## REFERENCES

1. Zimmermann MB, Jooste PL, Pandav CS. Iodine-deficiency disorders. *Lancet* 2008;372(9645):1251-1262.
2. Pearce E N, Andersson M, Zimmermann MB. Global iodine nutrition: Where do we stand in 2013? *Thyroid* 2013;23:523-528.
3. Stagnaro-Green A, Abalovich M, Alexander E, et al. Guidelines of the American Thyroid Association for the diagnosis and management of thyroid disease during pregnancy and postpartum. *Thyroid*. 2011;21:1081-1125.
4. De Groot L, Abalovich M, Alexander EK, et al. Management of thyroid dysfunction during pregnancy and postpartum: an Endocrine Society clinical practice guideline. *J Clin Endocrinol Metab* 2012;97:2543-2565.
5. Zhou SJ, Anderson AJ, Gibson RA, et al. Effect of iodine supplementation in pregnancy on child development and other clinical outcomes: a systematic review of randomized controlled trials. *Am J Clin Nutr* 2013;98:1241-1254.
6. Bath SC, Steer CD, Golding J, et al. Effect of inadequate iodine status in UK pregnant women on cognitive outcomes in their children: results from the Avon Longitudinal Study of Parents and Children (ALSPAC). *Lancet* 2013;382:331-337.
7. Hynes KL, Otahal P, Hay I, et al. Mild iodine deficiency during pregnancy is associated with reduced educational outcomes in the offspring: 9-year follow-up of the gestational iodine cohort. *J Clin Endocrinol Metab* 2013;98:1954-1962.
8. Vejbjerg P, Knudsen N, Perrild H, et al. Estimation of iodine intake from various urinary iodine measurements in population studies. *Thyroid* 2009;19:1281-1286.
9. Jaddoe VW, van Duijn CM, Franco OH, et al. The Generation R Study: design and cohort update 2012. *Eur J Epidemiol* 2012;27:739-756.
10. Tellegen PJ, Winkel M, Wijnberg-Williams B, et al. *Snijders-Oomen Niet-Verbale Intelligentietest: SON-R 2 ½ -7*. Amsterdam: Boom Testuitgevers; 2005.
11. Bon WHJ, van. *Taaltests voor Kinderen*. Lisse: Swets & Zeitlinger; 1982.
12. Ghassabian A, Bongers-Schokking JJ, Henrichs J, Jaddoe VW, Visser TJ, Visser W, et al. Maternal thyroid function during pregnancy and behavioral problems in the offspring: the generation R study. *Pediatr Res* 2011;69:454-459.
13. Prieler J. *Raven's advanced progressive matrices, vol 24.00*. Schufried, Mödling, Austria; 2003.



## Maternal iodine in pregnancy and children's cognition

1  
2  
3 14. Taylor PN, Okosieme OE, Dayan CM, Lazarus JH. Therapy of endocrine disease:  
4 Impact of iodine supplementation in mild-to-moderate iodine deficiency: systematic review and  
5 meta-analysis. Eur J Endocrinol;170(1):R1-R15.  
6

7  
8 15. National Institute for Public Health and the Environment. The iodine intake of children  
9 and adults in the Netherlands : Results of the Dutch National Food Consumption Survey 2007-  
10 2010. 2012;  
11 [http://www.rivm.nl/en/Documents\\_and\\_publications/Scientific/Reports/2012/april/The\\_iodine\\_intake\\_of\\_children\\_and\\_adults\\_in\\_the\\_Netherlands\\_Results\\_of\\_the\\_Dutch\\_National\\_Food\\_Consumption\\_Survey\\_2007\\_2010](http://www.rivm.nl/en/Documents_and_publications/Scientific/Reports/2012/april/The_iodine_intake_of_children_and_adults_in_the_Netherlands_Results_of_the_Dutch_National_Food_Consumption_Survey_2007_2010). Date accessed 2014-03-05.  
12  
13  
14  
15

16 16. van Mil NH, Tiemeier H, Bongers-Schokking JJ, et al. Low urinary iodine excretion  
17 during early pregnancy is associated with alterations in executive functioning in children. J Nutr  
18 2012;142:2167-2174.  
19  
20  
21  
22  
23  
24  
25  
26  
27  
28  
29  
30  
31  
32  
33  
34  
35  
36  
37  
38  
39  
40  
41  
42  
43  
44  
45  
46  
47  
48  
49  
50  
51  
52  
53  
54  
55  
56  
57  
58  
59  
60

## Maternal iodine in pregnancy and children's cognition

1  
2  
3  
4  
5  
6  
7  
8  
9  
10  
11  
12  
13  
14  
15  
16  
17  
18  
19  
20  
21  
22  
23  
24  
25  
26  
27  
28  
29  
30  
31  
32  
33  
34  
35  
36  
37  
38  
39  
40  
41  
42  
43  
44  
45  
46  
47  
48  
49  
50  
51  
52  
53  
54  
55  
56  
57  
58  
59  
60

What is already known on this subject?

Severe iodine deficiency, one of the major preventable causes of mental retardation worldwide, is a rare condition due to the iodine fortification of salt in many countries. Nevertheless, mild iodine deficiency is still considered a major public health concern, even in some developed countries. Reports from populations with an insufficient iodine intake suggest that children of mothers with mild iodine deficiency during pregnancy are at risk for cognitive impairments.

What this study adds?

The present study, performed in a country with optimal iodine intake, showed no clear relation between maternal relatively low urinary iodine concentration in early pregnancy and children's nonverbal IQ or language comprehension at age six years. The lack of a clear association with children's cognitive abilities likely reflect the Dutch iodine fortification policy, which allows adding iodized salt to almost all processed food and emphasizes the monitoring of iodine intake in the population. In case of non-optimal intake, measures would be taken to boost the supply of iodine in the population. This suggests that iodine fortification programmes can prevent adverse neurodevelopmental outcomes in children.

STROBE Statement—checklist of items that should be included in reports of observational studies

|                           | Item No | Recommendation                                                                                                                                                                                                                                                                                                                                                                                                                                                                                                                                                                                                                                                                                                                                                                          |
|---------------------------|---------|-----------------------------------------------------------------------------------------------------------------------------------------------------------------------------------------------------------------------------------------------------------------------------------------------------------------------------------------------------------------------------------------------------------------------------------------------------------------------------------------------------------------------------------------------------------------------------------------------------------------------------------------------------------------------------------------------------------------------------------------------------------------------------------------|
| <b>Title and abstract</b> | 1       | (a) Indicate the study's design with a commonly used term in the title or the abstract<br><b>Cohort</b>                                                                                                                                                                                                                                                                                                                                                                                                                                                                                                                                                                                                                                                                                 |
|                           |         | (b) Provide in the abstract an informative and balanced summary of what was done and what was found<br><b>Done</b>                                                                                                                                                                                                                                                                                                                                                                                                                                                                                                                                                                                                                                                                      |
| <b>Introduction</b>       |         |                                                                                                                                                                                                                                                                                                                                                                                                                                                                                                                                                                                                                                                                                                                                                                                         |
| Background/rationale      | 2       | Explain the scientific background and rationale for the investigation being reported<br><b>Done</b>                                                                                                                                                                                                                                                                                                                                                                                                                                                                                                                                                                                                                                                                                     |
| Objectives                | 3       | State specific objectives, including any prespecified hypotheses<br><b>The goal of this study was to investigate the association between maternal low urinary iodine concentration (UIC) in pregnancy and children's cognition in a population-based sample from a country with an optimal iodine status (the Netherlands).</b>                                                                                                                                                                                                                                                                                                                                                                                                                                                         |
| <b>Methods</b>            |         |                                                                                                                                                                                                                                                                                                                                                                                                                                                                                                                                                                                                                                                                                                                                                                                         |
| Study design              | 4       | Present key elements of study design early in the paper<br><b>Population-based birth cohort</b>                                                                                                                                                                                                                                                                                                                                                                                                                                                                                                                                                                                                                                                                                         |
| Setting                   | 5       | Describe the setting, locations, and relevant dates, including periods of recruitment, exposure, follow-up, and data collection<br><b>In Rotterdam, the Netherlands</b><br><b>In total, 7145 pregnant women were recruited in early pregnancy (gestational age&lt;18 weeks).</b><br><b>All women had a delivery date between April 2002 and January 2006.</b><br><b>Data on child cognitive measures were available in 1525 children at age six years.</b>                                                                                                                                                                                                                                                                                                                              |
| Participants              | 6       | (a) <i>Cohort study</i> —Give the eligibility criteria, and the sources and methods of selection of participants. Describe methods of follow-up<br><b>In total, 7145 pregnant women were recruited in early pregnancy (gestational age&lt;18 weeks).</b><br><b>All women had a delivery date between April 2002 and January 2006.</b><br><b>At the age of six (mean age=6.0±0.3 years), the children were invited to visit the Generation R research centre.</b><br><i>Case-control study</i> —Give the eligibility criteria, and the sources and methods of case ascertainment and control selection. Give the rationale for the choice of cases and controls<br><i>Cross-sectional study</i> —Give the eligibility criteria, and the sources and methods of selection of participants |
|                           |         | (b) <i>Cohort study</i> —For matched studies, give matching criteria and number of exposed and unexposed<br><b>N/A</b><br><i>Case-control study</i> —For matched studies, give matching criteria and the number of controls per case                                                                                                                                                                                                                                                                                                                                                                                                                                                                                                                                                    |
| Variables                 | 7       | Clearly define all outcomes, exposures, predictors, potential confounders, and effect modifiers. Give diagnostic criteria, if applicable                                                                                                                                                                                                                                                                                                                                                                                                                                                                                                                                                                                                                                                |

|                              |    |                                                                                                                                                                                                                                                                                                                                                                                                                                                                                                                                                                                                                                                                                                                                                                                                                                                                                                                                                                                                                                                                                                                                                                                                      |
|------------------------------|----|------------------------------------------------------------------------------------------------------------------------------------------------------------------------------------------------------------------------------------------------------------------------------------------------------------------------------------------------------------------------------------------------------------------------------------------------------------------------------------------------------------------------------------------------------------------------------------------------------------------------------------------------------------------------------------------------------------------------------------------------------------------------------------------------------------------------------------------------------------------------------------------------------------------------------------------------------------------------------------------------------------------------------------------------------------------------------------------------------------------------------------------------------------------------------------------------------|
|                              |    | <b>Done</b>                                                                                                                                                                                                                                                                                                                                                                                                                                                                                                                                                                                                                                                                                                                                                                                                                                                                                                                                                                                                                                                                                                                                                                                          |
| Data sources/<br>measurement | 8* | For each variable of interest, give sources of data and details of methods of assessment (measurement).<br><b>Done</b><br>Describe comparability of assessment methods if there is more than one group<br>N/A                                                                                                                                                                                                                                                                                                                                                                                                                                                                                                                                                                                                                                                                                                                                                                                                                                                                                                                                                                                        |
| Bias                         | 9  | Describe any efforts to address potential sources of bias<br><b>Done</b><br><b>Potential confounders were selected on the basis of background knowledge.</b>                                                                                                                                                                                                                                                                                                                                                                                                                                                                                                                                                                                                                                                                                                                                                                                                                                                                                                                                                                                                                                         |
| Study size                   | 10 | Explain how the study size was arrived at<br><b>In this group, data on child cognitive measures were available in 1525 children at age six years.</b><br><b>Possible power problem is discussed:</b><br><b>Because mild iodine deficiency is less prevalent in our sample, it is possible that we did not have the power to detect a significant association between maternal low UIC and children's cognitive delay. However, the observed effect sizes for low UIC in the present study (e.g. OR=1.33, 95%CI: 0.92-1.92 for suboptimum nonverbal IQ) were very similar to those of the British study (OR=1.35, 95%CI: 0.93-1.94) for the comparable measure but did not reach the significance level in either study.</b>                                                                                                                                                                                                                                                                                                                                                                                                                                                                          |
| Quantitative variables       | 11 | Explain how quantitative variables were handled in the analyses. If applicable, describe which groupings were chosen and why<br><b>Language comprehension scores were log-transformed to meet the assumption of normality. To facilitate the interpretation of findings, we also used logistic regression to explore whether maternal low UIC was related to the odds of having a nonverbal IQ or language comprehension score in the lowest quartile of the sample (nonverbal IQ&lt;93 and language comprehension score&lt;0.77).</b>                                                                                                                                                                                                                                                                                                                                                                                                                                                                                                                                                                                                                                                               |
| Statistical methods          | 12 | (a) Describe all statistical methods, including those used to control for confounding<br><b>Maternal low UIC during early pregnancy was the determinant in all analyses. We used linear regression to examine the relation between maternal low UIC and children's nonverbal IQ and language comprehension scores.</b><br><b>To facilitate the interpretation of findings, we also used logistic regression to explore whether maternal low UIC was related to the odds of having a nonverbal IQ or language comprehension score in the lowest quartile of the sample.</b><br><b>The relation between maternal UIC and children's cognition was examined in three steps: model 1, univariate association; model 2, adjusted for the child's sex and age, and maternal age and education; model 3 additionally adjusted for a child's ethnic background, birth order, history of breastfeeding at age six months, paternal age, maternal body mass index (BMI), maternal history of smoking, maternal IQ, marital status, paternal education, maternal psychopathology in pregnancy, maternal folate concentration in early pregnancy, household income, and time of urine sampling in pregnancy.</b> |

1  
2 (b) Describe any methods used to examine subgroups and interactions

3 N/A

4  
5 (c) Explain how missing data were addressed

6 **Missing values were imputed using multiple imputations. Thirty copies of**  
7 **the original data set were generated with missing values replaced by**  
8 **values randomly generated from the predictive distribution, on the basis**  
9 **of the correlation between the variables.**

10  
11 (d) *Cohort study*—If applicable, explain how loss to follow-up was addressed

12 **There was no difference in maternal iodine levels between mother-child**  
13 **pairs included in the analyses and those excluded because of missing data**  
14 **on child cognitive measures. Likewise, demographic characteristics**  
15 **including maternal age and education, household income, or child's**  
16 **characteristics such as gestational age at birth or ethnic background did**  
17 **not differ between these two groups.**

18  
19 *Case-control study*—If applicable, explain how matching of cases and controls was  
20 addressed

21  
22 *Cross-sectional study*—If applicable, describe analytical methods taking account of  
23 sampling strategy

24 (e) Describe any sensitivity analyses

25 N/A

26 Continued on next page

---

**Results**


---

|                  |     |                                                                                                                                                                                                                                                                                                                                                                                                                                                                                                                                                                                                                                                                                                                                                                                                                                                                                                                                                                                                                                                                                                                                                                                                                                                                                                                                                                                                                                                    |
|------------------|-----|----------------------------------------------------------------------------------------------------------------------------------------------------------------------------------------------------------------------------------------------------------------------------------------------------------------------------------------------------------------------------------------------------------------------------------------------------------------------------------------------------------------------------------------------------------------------------------------------------------------------------------------------------------------------------------------------------------------------------------------------------------------------------------------------------------------------------------------------------------------------------------------------------------------------------------------------------------------------------------------------------------------------------------------------------------------------------------------------------------------------------------------------------------------------------------------------------------------------------------------------------------------------------------------------------------------------------------------------------------------------------------------------------------------------------------------------------|
| Participants     | 13* | <p>(a) Report numbers of individuals at each stage of study—eg numbers potentially eligible, examined for eligibility, confirmed eligible, included in the study, completing follow-up, and analysed</p> <p><b>In total, 7145 pregnant women were recruited in early pregnancy (gestational age&lt;18 weeks). During early pregnancy, 2375 pregnant women provided urine samples. Urinary iodine concentration was assessed in 2251 pregnant women with singleton live birth. In this group, data on child cognitive measures were available in 1525 children at age six years.</b></p> <hr/> <p>(b) Give reasons for non-participation at each stage</p> <p><b>The reasons are given if known.</b></p> <hr/> <p>(c) Consider use of a flow diagram</p> <p><b>Criteria for eligibility and exclusion at each stage are described in the text.</b></p>                                                                                                                                                                                                                                                                                                                                                                                                                                                                                                                                                                                              |
| Descriptive data | 14* | <p>(a) Give characteristics of study participants (eg demographic, clinical, social) and information on exposures and potential confounders</p> <p><b>Table 1</b></p> <hr/> <p>(b) Indicate number of participants with missing data for each variable of interest</p> <p><b>The percentage of missing data for covariates were below 10% except for maternal psychopathology during pregnancy (17%), household income (17%), paternal education (32%), and child's history of breastfeeding (13%).</b></p> <hr/> <p>(c) <i>Cohort study</i>—Summarise follow-up time (eg, average and total amount)</p>                                                                                                                                                                                                                                                                                                                                                                                                                                                                                                                                                                                                                                                                                                                                                                                                                                           |
| Outcome data     | 15* | <p><i>Cohort study</i>—Report numbers of outcome events or summary measures over time</p> <p><b>Table 1</b></p> <hr/> <p><i>Case-control study</i>—Report numbers in each exposure category, or summary measures of exposure</p> <hr/> <p><i>Cross-sectional study</i>—Report numbers of outcome events or summary measures</p>                                                                                                                                                                                                                                                                                                                                                                                                                                                                                                                                                                                                                                                                                                                                                                                                                                                                                                                                                                                                                                                                                                                    |
| Main results     | 16  | <p>(a) Give unadjusted estimates and, if applicable, confounder-adjusted estimates and their precision (eg, 95% confidence interval). Make clear which confounders were adjusted for and why they were included</p> <p><b>Table 2</b></p> <p><b>The relation between maternal UIC and children's cognition was examined in three steps: <i>model 1</i>, univariate association; <i>model 2</i>, adjusted for the child's sex and age, and maternal age and education; <i>model 3</i> additionally adjusted for a child's ethnic background, birth order, history of breastfeeding at age six months, paternal age, maternal body mass index (BMI), maternal history of smoking, maternal IQ, marital status, paternal education, maternal psychopathology in pregnancy, maternal folate concentration in early pregnancy, household income, and time of urine sampling in pregnancy.</b></p> <hr/> <p>(b) Report category boundaries when continuous variables were categorized</p> <p><b>To facilitate the interpretation of findings, we also used logistic regression to explore whether maternal low UIC was related to the odds of having a nonverbal IQ or language comprehension score in the lowest quartile of the sample (nonverbal IQ&lt;93 and language comprehension score&lt;0.77).</b></p> <hr/> <p>(c) If relevant, consider translating estimates of relative risk into absolute risk for a meaningful time period</p> <p>N/A</p> |

1  
2 Other analyses 17 Report other analyses done—eg analyses of subgroups and interactions, and sensitivity  
3 analyses  
4 N/A

---

#### Discussion

7 Key results 18 Summarise key results with reference to study objectives  
8 **The present study, performed in an iodine sufficient country, showed no clear**  
9 **relation between maternal low UIC in early pregnancy and children’s nonverbal**  
10 **IQ or language comprehension at age six years. There are several possible**  
11 **explanations for this finding.**

13 Limitations 19 Discuss limitations of the study, taking into account sources of potential bias or imprecision.  
14 Discuss both direction and magnitude of any potential bias  
15 **Done**

17 Interpretation 20 Give a cautious overall interpretation of results considering objectives, limitations, multiplicity  
18 of analyses, results from similar studies, and other relevant evidence  
19 **Done**

21 Generalisability 21 Discuss the generalisability (external validity) of the study results  
22 **Done**

---

#### Other information

24 Funding 22 Give the source of funding and the role of the funders for the present study and, if applicable,  
25 for the original study on which the present article is based  
26 **Done in acknowledgement**

28  
29 \*Give information separately for cases and controls in case-control studies and, if applicable, for exposed and  
30 unexposed groups in cohort and cross-sectional studies.

31  
32  
33 **Note:** An Explanation and Elaboration article discusses each checklist item and gives methodological background and  
34 published examples of transparent reporting. The STROBE checklist is best used in conjunction with this article (freely  
35 available on the Web sites of PLoS Medicine at <http://www.plosmedicine.org/>, Annals of Internal Medicine at  
36 <http://www.annals.org/>, and Epidemiology at <http://www.epidem.com/>). Information on the STROBE Initiative is  
37 available at [www.strobe-statement.org](http://www.strobe-statement.org).  
38  
39  
40  
41  
42  
43  
44  
45  
46  
47  
48  
49  
50  
51  
52  
53  
54  
55  
56  
57  
58  
59  
60
